# Supplementary material for: The transition between work, sickness absence and pension in a cohort of Danish colorectal cancer survivors
Source: PubMed Central journal article supplement — BMJ Open. 2013 Feb 23;3(2):e002259. doi: 10.1136/bmjopen-2012-002259 (PMC3586129; doi:10.1136/bmjopen-2012-002259), 2013-02-23
Supplement: bmjopen-2012-002259.draft_revisions.pdf [file bmjopen-2012-002259.draft_revisions.pdf]

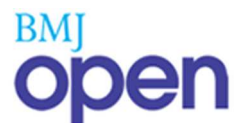

**The transition between work, sickness absence and pension  
in a cohort of Danish colorectal cancer survivors**

|                                 |                                                                                                                                                                                                                                                                                                                                          |
|---------------------------------|------------------------------------------------------------------------------------------------------------------------------------------------------------------------------------------------------------------------------------------------------------------------------------------------------------------------------------------|
| Journal:                        | <i>BMJ Open</i>                                                                                                                                                                                                                                                                                                                          |
| Manuscript ID:                  | bmjopen-2012-002259                                                                                                                                                                                                                                                                                                                      |
| Article Type:                   | Research                                                                                                                                                                                                                                                                                                                                 |
| Date Submitted by the Author:   | 25-Oct-2012                                                                                                                                                                                                                                                                                                                              |
| Complete List of Authors:       | Carlsen, Kathrine; Glostrup University Hospital, Research Centre for Prevention and Health<br>Harling, Henrik; Bispebjerg University Hospital, Department of Surgery<br>Pedersen, Jacob; National Research Centre for the Working Environment,<br>Osler, Merete; Glostrup University Hospital, Research Centre for Prevention and Health |
| <b>Primary Subject Heading</b>: | Oncology                                                                                                                                                                                                                                                                                                                                 |
| Secondary Subject Heading:      | Epidemiology                                                                                                                                                                                                                                                                                                                             |
| Keywords:                       | EPIDEMIOLOGY, Gastrointestinal tumours < ONCOLOGY, SOCIAL MEDICINE                                                                                                                                                                                                                                                                       |
|                                 |                                                                                                                                                                                                                                                                                                                                          |

SCHOLARONE™  
Manuscripts

1  
2  
3  
4 The transition between work, sickness absence and pension in a cohort of Danish colorectal cancer  
5 survivors.  
6  
7

8  
9 BY

10 Kathrine Carlsen, MSc, MPH, PhD\*<sup>1</sup>

11 Henrik Harling, MD, Clinical Doctor<sup>2</sup>

12 Jacob Pedersen, MSc, Statistician<sup>3</sup>

13 Merete Osler, MD, Professor<sup>4</sup>  
14  
15  
16  
17  
18  
19  
20  
21  
22  
23  
24  
25  
26

27 **E-mail addresses and affiliations:**

28 \* Corresponding author; kathrine.carlsen@regionh.dk, phone: +45 38633384, Fax: +45 38633977

29  
30 1: kathrine.carlsen@regionh.dk. Research Centre for Prevention and Health, Glostrup University  
31 Hospital, 2600 Glostrup, Denmark

32  
33 2: hhar0002@bbh.regionh.dk. Department of Surgery, Bispebjerg University Hospital, 2400  
34 Copenhagen, Denmark

35  
36 3: jpe@nrwe.dk. National Research Centre for the Working Environment, 2100 Copenhagen,  
37 Denmark

38  
39 4: merete.osler@regionh.dk. Research Centre for Prevention and Health, Glostrup University  
40 Hospital, 2600 Glostrup, Denmark  
41  
42  
43  
44

45 Number of words: 2499

46 Abstract: 268 words

47  
48 Number of references: 32  
49  
50  
51  
52  
53  
54  
55  
56  
57  
58  
59  
60

## Abstract

**Objectives:** The aim of this study was to evaluate the impact of socioeconomic and clinical factors on the transitions between work, sickness absence and retirement in a cohort of Danish colorectal cancer survivors.

**Design:** Register based cohort study with up to 10 years of follow-up.

**Setting:** Population based study with use of administrative health related and socioeconomic registers.

**Participants:** All persons (N=4343) diagnosed with colorectal cancer in Denmark in the years 2001-2009 while they were in their working age (18-63 years) and who were part of the labor force one year post diagnosis.

**Primary and secondary outcome measures:** By use of multi-state models in Cox proportional hazards models we analyzed the hazard ratio for re-employment, sickness absence and retirement in models including clinical as well as health related variables.

**Results:** One year after diagnosis 62% were working and 58% continued until end of follow-up. Socioeconomic factors were found to be associated with retirement but not with sickness absence and return to work. The risk for transition from work to sickness absence was increased if the disease was diagnosed at a later stage (stage III) 1.52 (95% CI: 1.21-1.91), not operated curatively 1.35 (95% CI: 1.11-1.63) and with occurrence of post-operative complications 1.25 (95% CI: 1.11-1.41). The opposite was found for the transition from sickness absence back to work.

**Conclusion:** Stage of disease, general health state, post-operative complications and the history of sickness absence and unemployment have an impact on the transition between work, sickness absence and disability pension. This leads to an increased focus on early detection of colorectal cancer, and the importance of avoidance of post-operative complications.

## Article summary

1  
2  
3  
4 Article focus:  
5

- 6 • How many colorectal cancer survivors return to work, stay at sickness absence, get unemployed  
7  
8 or become pensioners in the years following diagnosis?  
9  
10 • Does socioeconomic position or clinical factors predict re-employment, sickness absence,  
11  
12 unemployment or pension in this cohort?  
13  
14

15 Key messages:  
16

- 17 • First study to differentiate between re-employment, sickness absence, unemployment and  
18  
19 retirement in a cohort of colorectal cancer survivors.  
20  
21 • One year after diagnosis 62% had resumed work.  
22  
23 • Socioeconomic factors were associated with early retirement whereas clinical factors were  
24  
25 found to be associated with sickness absence and re-employment.  
26  
27  
28

29 Strengths and limitations:  
30

- 31 • This is a longitudinal population based study including more than 4000 persons diagnosed with  
32  
33 colorectal cancer.  
34  
35 • The study identifies an association between socioeconomic position / clinical factors and re-  
36  
37 employment / sickness absence / pension but is not able to identify mechanisms behind.  
38  
39  
40  
41

42 **What is new in this paper:**  
43

44 Very few studies have analyzed the impact colorectal cancer has on the affiliation to the labor  
45  
46 market. In this study we are able to identify clinical and socioeconomic risk factors for sickness  
47  
48 absence, work resumption and retirement.  
49  
50  
51  
52  
53  
54  
55  
56  
57  
58  
59  
60

## 1. Introduction

In 2008 nearly 500.000 persons in Europe were diagnosed with colorectal cancer making it the most common cancer and the second most common cause of cancer deaths in Europe<sup>1</sup>. From 1995 to 2007 the survival from colorectal cancer has steadily improved among all age groups<sup>2</sup> and the relative 5-year survival increased in the years 1990 to 2002 from 50% to 60% among persons aged 15 to 59 years<sup>3</sup>.

Throughout Europe life expectancy has increased leading to higher age at pension and longer time in the workforce. As the risk of colorectal cancer increases with age, it can be expected that still more persons will be diagnosed with colorectal cancer while they are an active part of the workforce.

Few studies have analyzed the impact of colorectal cancer on work participation in the years following diagnosis and treatment. The existing studies reported that 2/3 of those working at time of diagnosis resume work in the years after treatment. Risk factors for work cessation were high age; radiation therapy and co-morbidity<sup>4;5</sup>. Several studies<sup>6-9</sup> have shown a negative social gradient in survival of colorectal cancer, but the social consequences has not been studied despite the fact that a negative social gradient in return to work has been observed among cancer survivors in general<sup>10-17</sup>. Compared to persons diagnosed with testicular-, breast-, endocrine- or skin cancer patients with colorectal cancer had a higher risk of not resuming work and had longer time on sickness absence<sup>13;18-22</sup>.

In order to get a better understanding of the transitions between sickness absence and work it is important to take both socioeconomic and health related factors into account and to look more in depth on the different pathways in and out of the workforce.

1  
2  
3  
4 By use of detailed, nationwide, population based registers the aim of this study is to evaluate the  
5  
6 impact of both socioeconomic and clinical factors on the transitions between work, sickness  
7  
8 absence and retirement in a cohort of colorectal cancer survivors.  
9

## 10 11 12 **2. Materials and methods**

13  
14  
15 This study is based on Danish population based registers linked together with the unique personal  
16  
17 identification code given to all Danish residents.  
18  
19

### 20 21 22 *Danish Colorectal Cancer Group (DCCG)*

23  
24 The study population was derived from the national database of DCCG which includes around 93%  
25  
26 of patients in Denmark with a first-time adenocarcinoma of the rectum (ICD-10: C20) or colon  
27  
28 (ICD-C18). This database comprises prospectively collected data registered by surgeons. The  
29  
30 database has previously been used in epidemiological studies and is described in details elsewhere  
31  
32 <sup>23</sup>. From the database we obtained clinical data with relevance for the probability of returning to  
33  
34 work after treatment. Entry into the study was equal to date of surgery and was used to calculate the  
35  
36 follow-up time. Variables describing the disease were cancer type and tumor stage classified  
37  
38 according to the International Union Against Cancer (UICC). Information about surgical procedure  
39  
40 was included as curative operation (yes/no) and type of operation (1=rectal resection, 2=colonic  
41  
42 resection, 3=explorative laparotomy or formation of an ostomy, 4=local procedures). Health status  
43  
44 at time of surgery was measured by ASA score (according to the American Society of  
45  
46 Anesthesiologists) and postoperative complications.  
47  
48  
49

### 50 51 52 *Statistics Denmark*

1  
2  
3  
4 Information on a number of demographic and socioeconomic characteristics was obtained from the  
5  
6 population-based Integrated Database for Labour Market Research (IDA), which has been  
7  
8 administrated by Statistics Denmark since 1980<sup>24</sup>. From IDA we had information about country of  
9  
10 origin, marital status, education and job type. In order to obtain information on disposal income for  
11  
12 the family we also identified partners and their income. Disposal income was calculated as the  
13  
14 average of the family income three years before the year of diagnosis and was deflated according to  
15  
16 the 2000 value of the Danish kroner.  
17  
18  
19  
20

#### 21 *The Danish National Patient Registry (NPR)*

22 This register holds information on all hospitalizations and outpatient visits in Denmark since 1978.  
23  
24 In this study we used information of date of admission and discharge and diagnosis coded according  
25  
26 to *the International Classifications of Diseases (ICD-10)*<sup>25</sup>.  
27  
28  
29  
30  
31  
32

#### 33 *The Register of Medical Product Statistics (RMPS)*

34 Since 1994 every medical product sold on prescription by Danish pharmacies has been registered.  
35  
36 From this register we had information on date for redemption of the prescription and substance  
37  
38 classified according to the *anatomical-therapeutic-chemical (ATC)* system<sup>26</sup>.  
39  
40  
41  
42  
43

44 Co-morbidity preceding five years before the year of diagnosis was obtained from NPR and RMPS.

45 The following co-morbidities from the Charlson index were included and dichotomized to yes/no:

46 Cardiovascular disease, chronic obstructive pulmonary disease, diabetes and liver, kidney or  
47  
48 connective tissue diseases.  
49  
50  
51

#### 52 *Register based Evaluation of Marginalization (DREAM)*

53  
54  
55  
56  
57  
58  
59  
60

1  
2  
3  
4 The Danish labor market is characterized as a flexicurity system. Unemployed persons are  
5 warranted economic compensation if they are actively seeking job. If a person is unable to work due  
6 to illness or disability it is possible to receive sickness benefit or apply for early retirement if  
7 needed. The pathways between these different states are shown in figure 1, where the four outcomes  
8 represent four different and mutually separated states.  
9  
10  
11  
12  
13

14  
15 The outcome of the study was receipt of social transfer payments or in work.  
16  
17 Information about social transfer payments was obtained from the Danish population based  
18 administrative register DREAM. DREAM covers all residents in Denmark who have received  
19 social transfer payments from the state <sup>27</sup> in any given week since 1991 until week 13 in 2001. In  
20 work was defined as not receiving any social transfer payments for six consecutive weeks. Transfer  
21 income was divided into sickness benefit, unemployment benefit and permanent withdrawal from  
22 the workforce due to disablement.  
23  
24  
25  
26  
27  
28  
29  
30  
31  
32

### 33 *Study population*

34  
35 The study population comprised 31.570 persons diagnosed with colorectal cancer between 2001 and  
36 2009. Of these, we included 4343 persons aged 18-63 years, who were part of the workforce and  
37 survived the first postoperative year (see figure 2) leading to 12.569 person years and minimum 65  
38 weeks of follow-up.  
39  
40  
41  
42  
43  
44  
45

### 46 *Statistical analysis*

47  
48 The time duration of a given transfer payment was registered from the payment-starting week until  
49 the week the payment ended or time was truncated due to end of follow up time. If a person  
50 received a transfer payment that did not fit any of the four states (i.e. education) the time was  
51 censored but the person was allowed back into the model if he afterwards received a transfer  
52  
53  
54  
55  
56  
57  
58  
59  
60



1  
2  
3  
4 payment fitting one of the four states. A transition was defined as a shift between any of the four  
5  
6 states illustrated in Figure 1. Permanently censoring was used when a person reached the age limit  
7  
8 of 63 years, emigrated or died.  
9

10  
11 Beside the covariates concerning gender, age, etc. each record included three variables that was  
12  
13 processed during follow up and was both time and state dependent. Each of the processed time and  
14  
15 state dependent covariates did hold the present number of times the person had experienced work,  
16  
17 sick-listing or unemployment counted from start of follow up.  
18

19  
20 A multi-state model was used for analysing the transitions between the four states<sup>28</sup>. Each transition  
21  
22 was analysed separately using the Cox proportional hazards model in SAS (The PHREG procedure,  
23  
24 SAS version 9.2). The model included both time dependent covariates like gender and time, and  
25  
26 independent covariates like number of unemployment periods during the follow up. The duration of  
27  
28 weeks a person spented at each state was used as time scale. Because the baseline hazard for each  
29  
30 state was allowed to vary freely, the covariate relied on the assumption of proportionality  
31  
32  
33  
34

### 35 36 **3. Results**

37  
38 Table 1 shows the baseline characteristics for all patients stratified on those excluded (N=27.227)  
39  
40 and the study population (N=4343).The latter was diagnosed with a less severe disease and had a  
41  
42 higher SES at time of inclusion than the excluded.  
43

44  
45 One year after operation 62% of the study population were in work while 32% were  
46  
47 sick listed and 6% were unemployed (Table 2). Of those who were working, 58% continued  
48  
49 working for an average of 136 weeks.

50  
51 Table 3 and 4 shows the Hazard Ratio (HR) for transitions between work and sickness  
52  
53 absence and reverse. The occupational history was significantly associated with returning to work  
54  
55 and sickness absence. Previous periods of sickness absence and unemployment reduced the rate of  
56  
57  
58  
59  
60

1  
2  
3  
4 returning to work with 7% and 12% per episode, whereas previous episodes of work increased the  
5  
6 rate of both work and sickness absence. In addition, we found that increasing levels of education  
7  
8 increased the rate of transition from work back to sickness absence.  
9

10 Return to work after a period of sickness absence (Table 3) was less common among cancer  
11  
12 survivors who were operated in an advanced stage of disease, who did not have curative surgery  
13  
14 and who suffered postoperative complications.  
15

16  
17 Sickness absence following a period of work was primarily associated with disease  
18  
19 related factors (Table 4). In contrast to return to work, patients diagnosed with rectal cancer had an  
20  
21 increased risk for sickness absence (HR=1.17 (1.03-1.32)) compared to those operated for colonic  
22  
23 cancer. Furthermore we found that an ASA score on III increased the risk for sickness absence with  
24  
25 almost 40%.  
26  
27

28 The risk factors associated with permanently withdrawal from the labor market one year after  
29  
30 operation are shown in Table 5. Since the transition from work and unemployment to retirement  
31  
32 follows the same pathways, these groups were joined in order to gain more power. The risk for  
33  
34 retirement was not only related to the disease but also to SEP. Manual work and increasing disposal  
35  
36 income reduces the risk for retirement after an episode of sickness absence and work, respectively.  
37  
38 Compared to patients in work, the HR for retirement was 5.89 (3.46-10.03) among unemployed  
39  
40 survivors.  
41  
42

43 Advanced stage at diagnosis and high ASA score increased the risk for retirement among both  
44  
45 groups.  
46  
47

#### 48 49 50 51 **4. Discussion and conclusion** 52 53 54 55 56 57 58 59 60

1  
2  
3  
4 In this cohort study including 4343 Danish colorectal cancer patients, who were part of the  
5  
6 workforce after the first postoperative year, we found that 62% were working one year after  
7  
8 operation.  
9

10 One year after operation previous episodes of sickness absence and unemployment, cancer stage at  
11  
12 diagnosis, curative operation and post-operative complications were associated with labor market  
13  
14 affiliation during follow-up whereas SEP was only weakly associated with the transition between  
15  
16 the different occupational states.  
17

18  
19 The observed rate of return to work is in accordance with previous studies on  
20  
21 colorectal cancer survivors, where return to full time employment was reported in 60%-89%  
22  
23 dependent on time from diagnosis, definition of return to work and severity of the disease.  
24

25  
26 In this study we decided only to include survivors, who were still part of the workforce one year  
27  
28 after operation, based on a notion that it is not clinical relevant to study full return to work before  
29  
30 the end of a one-year survival period. In this selected group of patients the observed resumption of  
31  
32 work was rather low compared to previous studies where up to 89% of patients had returned to  
33  
34 work at some point after diagnosis<sup>29</sup>. This could be caused by the fact that there is a lack of  
35  
36 consensus regarding definition and measurement of return to work. Thus, in some studies return to  
37  
38 work is simply the number of persons working at time of follow-up divided by the number working  
39  
40 at baseline<sup>10;30</sup>. In other studies return to work is measured among those persons, who are part of  
41  
42 the workforce at time of follow-up, and in still other studies working is self-reported and covers  
43  
44 from one week to permanently re-employed<sup>29</sup>  
45  
46  
47

48 The lack of a clear definition can result in misinterpretation of factors related to the disease and SEP  
49  
50 since the underlying mechanisms in the transition from sickness absence back to work or to  
51  
52 disability pension seems to follow different pathways. Leaving the workforce for any type of  
53  
54 pension is an irreversible process and is assigned when work demands exceeds health and mental  
55  
56  
57  
58  
59  
60

1  
2  
3  
4 resources and is thus dependent on both health and work related factors. On the other hand,  
5  
6 unemployment and sickness absence both include conditions with an expectation of resuming work  
7  
8 and is more related to either SEP or health, respectively.  
9

10  
11 The exclusion of persons who take disability pension the first year and the lower  
12  
13 social one-year survival after colorectal cancer among socially deprived (23) might explain our  
14  
15 finding of no effect of SEP on work and sickness absence one year after diagnosis of colorectal  
16  
17 cancer. It seems as a 'healthy worker effect' where the most affluent survive the first year without  
18  
19 leaving the workforce for disability pension.  
20

21  
22 In the present study, the transition between work, sickness absence and disability  
23  
24 pension one year after operation was primarily associated with factors related to the cancer disease.  
25  
26 The risk for transition from work to sickness absence was increased if the disease was diagnosed at  
27  
28 a later stage, not operated curatively and with occurrence of post-operative complications. The  
29  
30 opposite was found for the transition from sickness absence back to work. The association between  
31  
32 disease related factors and resuming of work after a cancer diagnosis including colorectal cancer  
33  
34 has been observed in other studies where tumor stage <sup>13;31</sup>, treatment <sup>4;31</sup>, physical symptoms <sup>16</sup> and  
35  
36 ASA-score were reported to be negatively associated with return to work.  
37  
38 We found that persons diagnosed with rectal cancer had a significant increased risk for sickness  
39  
40 absence and retirement possibly due to the fact that this patient group in contrast to colon cancer  
41  
42 patients more often will have to learn to take care of an ostomy or suffer from abnormal bowel and  
43  
44 urinary function years after the operation <sup>32</sup>. Unfortunately, we could not account for these factors in  
45  
46 our analysis.  
47  
48  
49

50  
51  
52  
53 *Strengths and limitations*  
54  
55  
56  
57  
58  
59  
60

1  
2  
3  
4 The present study is based on data from a well-defined clinical database of all Danish colorectal  
5 cancer patients. The database has a high completeness and data validity and missing values are  
6 random and not associated with the outcome under study whereby selection-bias is removed.  
7  
8

9  
10 Variables regarding socioeconomic position and the affiliation to the labour market are  
11 administrative data collected prospectively why recall-bias is eliminated.  
12  
13

14  
15 This study has, however, some limitations. First of all we were not able to include  
16 complementary treatment as chemotherapy and radiation, reduced working hours or job changes in  
17 our analysis. Complementary cancer treatment can have a negative effect on the physical and  
18 psychological work ability and has been shown to be associated with reductions in work hours and  
19 reassignment to other work tasks<sup>11;16;31</sup>. We defined return to work as not receiving any transfer  
20 payments for six consecutive weeks. This can lead to misclassification of persons leaving the  
21 workforce without receiving economic compensation from the state. This is, however, very seldom  
22 in Denmark and can be ignored in this study.  
23  
24  
25  
26  
27  
28  
29  
30  
31  
32  
33  
34

### 35 *Conclusion*

36  
37 This nationwide study of colorectal cancer patients who have survived one year shows that stage of  
38 disease, general health state of the individual, post-operative complications and the history of  
39 sickness absence and unemployment have an impact on the transition between work, sickness  
40 absence and disability pension. This leads to an increased focus on early detection of colorectal  
41 cancer, and the importance of avoidance of post-operative complications. In addition, special  
42 attention should be on the more vulnerable persons who have a history of work related problems  
43 with episodes outside the working market.  
44  
45  
46  
47  
48  
49  
50  
51  
52  
53  
54

### 55 **Acknowledgment**

56  
57  
58  
59  
60

1  
2  
3  
4 This work is funded by The Danish Cancer Society and The Novo Nordisk Foundation and is part  
5  
6 of The Centre for Integrated Rehabilitation of Cancer Patients (CIRE).  
7  
8  
9

10  
11 **Author contribution:**

12 Study conception and design: All authors

13  
14 Acquisition of data: Merete Osler and Kathrine Carlsen

15  
16 Analysis of data: Kathrine Carlsen

17  
18 Interpretation of data: All authors

19  
20 Writing manuscript: All authors  
21  
22  
23  
24  
25  
26  
27  
28  
29  
30  
31  
32  
33  
34  
35  
36  
37  
38  
39  
40  
41  
42  
43  
44  
45  
46  
47  
48  
49  
50  
51  
52  
53  
54  
55  
56  
57  
58  
59  
60

Figure 1: Transition states between labor market outcomes in Denmark. Work, sickness absence and unemployment covers persons in the workforce while retirement independent of reason (disability or age) are an irreversible state, where persons are considered to leave the workforce forever.

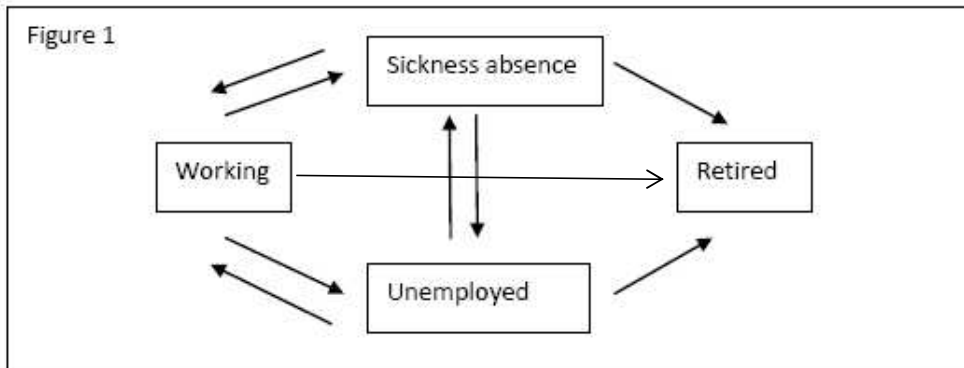

Figure 2: Flowchart showing the selection of persons from the total database to the final study population\*.

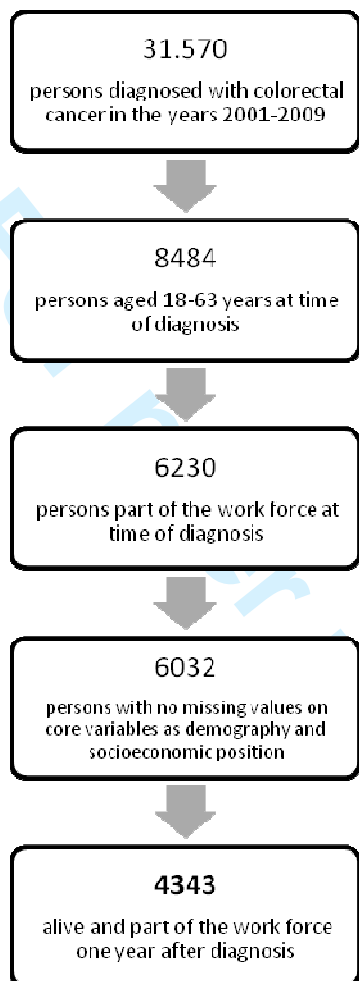

\* From January 2001 to December 2009 a total of 31 570 persons were diagnosed with colonic or rectal cancer. In total we excluded 25 538 persons: 23 086 persons as they were not in their working-age (18-63 years) at time of diagnosis, 2254 had retired due to disability before diagnosis and 198 because of missing values on demographic or socioeconomic variables. In addition, 1689 persons died or withdrew from the workforce within the first year after diagnosis.



Table 1: Characteristics of the colorectal cancer patients diagnosed in Denmark, 2001-2009 (N=31.570). The total population is divided into three groups: A) Excluded due to age, retirement before diagnosis and missing values (N=25.538), B) excluded during the first year due to retirement or death (N=1689) and C) the included persons (N=4343).

|                                                     | Excluded population<br>N (%) | Excluded during the first<br>year N (%) | Included after the first year<br>N (%) | P      |
|-----------------------------------------------------|------------------------------|-----------------------------------------|----------------------------------------|--------|
| <b>Education</b>                                    |                              |                                         |                                        | <.0001 |
| Primary school                                      | 11 470 (45)                  | 584 (35)                                | 1244 (29)                              |        |
| Vocational and short education                      | 7576 (30)                    | 781 (46)                                | 2037 (47)                              |        |
| Medium and long education                           | 2520 (10)                    | 324 (19)                                | 1062 (24)                              |        |
| Unknown                                             | 3972 (15)                    | 0 (0)                                   | 0 (0)                                  |        |
| <b>Disposal income (DKr.)</b>                       |                              |                                         |                                        | <.0001 |
| Mean                                                | 136 134                      | 192 206                                 | 210 807                                |        |
| <b>Job type</b>                                     |                              |                                         |                                        | <.0001 |
| Management and knowledge work                       | 311 (1)                      | 190 (11)                                | 740 (17)                               |        |
| Office and sale (non-manual)                        | 722 (3)                      | 401 (24)                                | 1414 (33)                              |        |
| Manual                                              | 21 399 (84)                  | 893 (53)                                | 1661 (38)                              |        |
| Other                                               | 3106 (12)                    | 205 (12)                                | 528 (12)                               |        |
| <b>Gender</b>                                       |                              |                                         |                                        | <.0001 |
| Women                                               | 12 380 (48)                  | 691 (41)                                | 1913 (44)                              |        |
| Men                                                 | 13 158 (52)                  | 998 (59)                                | 2430 (56)                              |        |
| <b>Age</b>                                          |                              |                                         |                                        | <.0001 |
| Mean                                                | 74.8                         | 56.6                                    | 53.8                                   |        |
| <b>Country of birth</b>                             |                              |                                         |                                        | <.0001 |
| Denmark                                             | 24 648 (97)                  | 1637 (97)                               | 4150 (96)                              |        |
| Other                                               | 890 (3)                      | 52 (3)                                  | 193 (4)                                |        |
| <b>Marital status</b>                               |                              |                                         |                                        | <.0001 |
| Married / cohabiting                                | 12 146 (48)                  | 1042 (62)                               | 3162 (73)                              |        |
| Single                                              | 11 655 (46)                  | 494 (29)                                | 1154 (26)                              |        |
| Unknown                                             | 1737 (7)                     | 153 (9)                                 | 27 (1)                                 |        |
| <b>Year of operation</b>                            |                              |                                         |                                        | 0.36   |
| 2001                                                | 1896 (7)                     | 104 (6)                                 | 309 (7)                                |        |
| 2002                                                | 2794 (11)                    | 178 (10)                                | 458 (10)                               |        |
| 2003                                                | 2754 (11)                    | 176 (10)                                | 439 (10)                               |        |
| 2004                                                | 2883 (11)                    | 213 (13)                                | 494 (11)                               |        |
| 2005                                                | 2968 (12)                    | 210 (12)                                | 486 (11)                               |        |
| 2006                                                | 3064 (12)                    | 199 (12)                                | 568 (13)                               |        |
| 2007                                                | 2986 (12)                    | 211 (12)                                | 545 (13)                               |        |
| 2008                                                | 3136 (12)                    | 197 (12)                                | 530 (12)                               |        |
| 2009                                                | 3057 (12)                    | 201 (12)                                | 514 (12)                               |        |
| <b>Type of cancer</b>                               |                              |                                         |                                        | <.0001 |
| Colonic                                             | 16 776 (66)                  | 1063 (63)                               | 2464 (57)                              |        |
| Rectal                                              | 8546 (34)                    | 626 (37)                                | 1879 (43)                              |        |
| <b>Stage</b>                                        |                              |                                         |                                        | <.0001 |
| I                                                   | 8082 (32)                    | 306 (18)                                | 1535 (35)                              |        |
| II                                                  | 1052 (4)                     | 43 (3)                                  | 146 (3)                                |        |
| III                                                 | 6058 (24)                    | 351 (21)                                | 1411 (32)                              |        |
| IV                                                  | 6984 (27)                    | 858 (51)                                | 760 (18)                               |        |
| Unknown                                             | 3362 (13)                    | 131 (8)                                 | 491 (11)                               |        |
| <b>Comorbidity</b>                                  |                              |                                         |                                        | <.0001 |
| No                                                  | 19 834 (78)                  | 1447 (86)                               | 4018 (93)                              |        |
| Yes                                                 | 5704 (22)                    | 224 (14)                                | 325 (7)                                |        |
| <b>ASA</b>                                          |                              |                                         |                                        | <.0001 |
| I                                                   | 3444 (13)                    | 484 (29)                                | 2168 (50)                              |        |
| II                                                  | 12 012 (47)                  | 771 (46)                                | 1731 (40)                              |        |
| ->III                                               | 7488 (29)                    | 240 (14)                                | 172 (4)                                |        |
| Unknown                                             | 2594 (10)                    | 194 (11)                                | 272 (6)                                |        |
| <b>Curative operation</b>                           |                              |                                         |                                        | <.0001 |
| Yes                                                 | 15 932 (62)                  | 677 (40)                                | 3278 (75)                              |        |
| No                                                  | 7952 (31)                    | 884 (52)                                | 867 (20)                               |        |
| Unknown                                             | 1654 (6)                     | 128 (8)                                 | 198 (5)                                |        |
| <b>Type of operation</b>                            |                              |                                         |                                        | <.0001 |
| Rectal resection                                    | 2835 (11)                    | 228 (14)                                | 206 (5)                                |        |
| Colonic resection                                   | 4650 (18)                    | 306 (18)                                | 1352 (31)                              |        |
| Explorative laparotomy or formation of<br>an ostomy | 9576 (38)                    | 537 (32)                                | 1445 (33)                              |        |
| Local procedures                                    | 5820 (23)                    | 367 (22)                                | 1197 (28)                              |        |
| Unknown                                             | 2657 (10)                    | 251 (15)                                | 143 (3)                                |        |
| <b>Post-operative complications</b>                 |                              |                                         |                                        | =0.70  |
| No                                                  | 21 793 (85)                  | 1448 (86)                               | 3689 (85)                              |        |
| Yes                                                 | 3745 (15)                    | 241 (14)                                | 654 (15)                               |        |

Table 2

Mean number of weeks from one state of employment to the next among 4343 patients aged 18-63 years diagnosed with colorectal cancer in the years 2001 to 2009 and part of the workforce at time of follow-up.

| Mean time in weeks from one year after operation and first change in employment state (% of population) | To work  | To sickness absence | To unemployment | To retirement | To censoring due to age, dead, migration or end of follow-up |
|---------------------------------------------------------------------------------------------------------|----------|---------------------|-----------------|---------------|--------------------------------------------------------------|
| From work (N=2679 / 62%)                                                                                | --       | 57 (31%)            | 63 (10%)        | 75 (1%)       | 136 (58%)                                                    |
| From sickness absence (N=1406 / 32%)                                                                    | 16 (34%) | --                  | 29 (9%)         | 30 (28%)      | 36 (30%)                                                     |
| From unemployment (N=258/ 6%)                                                                           | 22 (47%) | 28 (17%)            | --              | 63 (13%)      | 77 (23%)                                                     |

Table 3: HR (95% CI) for return to Work after sickness absence in relation to socioeconomic and clinical factors among 4343 patients aged 18-63 diagnosed with colorectal cancer in the years 2001 to 2009, and part of the work force at time of follow-up.

| SICKNESS ABSENCE → WORK                          | HR – unadjusted<br>(events: 2125) | HR - adjusted for<br>SES | HR - adjusted for<br>SES and<br>confounders* | HR - adjusted for SES,<br>confounders and<br>clinical variables |
|--------------------------------------------------|-----------------------------------|--------------------------|----------------------------------------------|-----------------------------------------------------------------|
| <b>Education</b>                                 |                                   |                          |                                              |                                                                 |
| Primary school                                   | 1                                 | 1                        | 1                                            | 1                                                               |
| Vocational and short education                   | 0.87 (0.76-0.98)                  | 0.91 (0.79-1.05)         | 0.91 (0.78-1.04)                             | 0.92 (0.79-1.06)                                                |
| Medium and long education                        | 1.01 (0.91-1.13)                  | 1.09 (0.96-1.24)         | 1.08 (0.95-1.23)                             | 1.06 (0.93-1.21)                                                |
| <b>Disposal income #</b>                         |                                   |                          |                                              |                                                                 |
| Lowest quartile                                  | 1                                 | 1                        | 1                                            | 1                                                               |
| Second lowest quartile                           | 1.11 (0.97-1.26)                  | 1.03 (0.90-1.17)         | 1.01 (0.88-1.15)                             | 1.07 (0.94-1.22)                                                |
| Second highest quartile                          | 1.27 (1.12-1.44)*                 | 1.14 (1.00-1.29)         | 1.12 (0.98-1.27)                             | 1.15 (1.00-1.31)                                                |
| Highest quartile                                 | 1.25 (1.10-1.42)*                 | 1.15 (1.00-1.33)         | 1.14 (0.99-1.32)                             | 1.16 (1.00-1.34)                                                |
| <b>Job type</b>                                  |                                   |                          |                                              |                                                                 |
| Management and knowledge work                    | 1.18 (0.95-1.22)                  | 1.10 (0.90-1.28)         | 1.10 (0.94-1.28)                             | 1.11 (0.95-1.30)                                                |
| Office and sale (non-manual)                     | 1.07 (0.97-1.17)                  | 1.07 (0.97-1.19)         | 1.09 (0.98-1.22)                             | 1.10 (0.99-1.23)                                                |
| Manual                                           | 1                                 | 1                        | 1                                            | 1                                                               |
| Other                                            | 0.71 (0.58-0.87)                  | 0.71 (0.57-0.86)*        | 1.17 (0.50-2.29)                             | 0.88 (0.37-1.73)                                                |
| <b>Previous periods of work</b>                  |                                   |                          |                                              |                                                                 |
|                                                  | 1.01 (1.01-1.02)*                 | 1.13 (1.11-1.16)**       | 1.13 (1.11-1.16)**                           | 1.13 (1.11-1.16)**                                              |
| <b>Previous periods of sickness absence</b>      |                                   |                          |                                              |                                                                 |
|                                                  | 1.05 (1.04-1.05)**                | 0.94 (0.92-0.96)**       | 0.94 (0.92-0.96)**                           | 0.93 (0.91-0.95)**                                              |
| <b>Previous periods of unemployment</b>          |                                   |                          |                                              |                                                                 |
|                                                  | 0.98 (0.98-0.99)*                 | 0.89 (0.87-0.91)**       | 0.89 (0.87-0.91)**                           | 0.88 (0.87-0.90)**                                              |
| <b>Type of cancer</b>                            |                                   |                          |                                              |                                                                 |
| Colonic                                          | 1                                 |                          |                                              | 1                                                               |
| Rectal                                           | 1.01 (0.93-1.10)                  |                          |                                              | 0.96 (0.84-1.08)                                                |
| <b>Stage</b>                                     |                                   |                          |                                              |                                                                 |
| I                                                | 1                                 |                          |                                              | 1                                                               |
| II                                               | 0.73 (0.56-0.94)*                 |                          |                                              | 0.82 (0.62-1.06)                                                |
| III                                              | 0.76 (0.69-0.84)**                |                          |                                              | 0.74 (0.66-0.82)**                                              |
| IV                                               | 0.36 (0.31-0.41)**                |                          |                                              | 0.53 (0.41-0.68)**                                              |
| Unknown                                          | 1.14 (1.00-1.30)                  |                          |                                              | 1.15 (0.96-1.39)                                                |
| <b>Comorbidity</b>                               |                                   |                          |                                              |                                                                 |
| No                                               | 1                                 |                          |                                              | 1                                                               |
| Yes                                              | 0.81 (0.73-0.89)*                 |                          |                                              | 0.90 (0.82-1.00)                                                |
| <b>ASA</b>                                       |                                   |                          |                                              |                                                                 |
| I                                                | 1                                 |                          |                                              | 1                                                               |
| II                                               | 0.84 (0.77-0.92)*                 |                          |                                              | 0.93 (0.85-1.03)                                                |
| >III                                             | 0.67 (0.52-0.84)*                 |                          |                                              | 0.85 (0.65-1.07)                                                |
| Unknown                                          | 0.89 (0.73-1.06)                  |                          |                                              | 1.07 (0.79-1.41)                                                |
| <b>Curative I operation</b>                      |                                   |                          |                                              |                                                                 |
| Yes                                              | 1                                 |                          |                                              | 1                                                               |
| No                                               | 0.43 (0.38-0.49)**                |                          |                                              | 0.69 (0.55-0.86)*                                               |
| Unknown                                          | 0.83 (0.68-1.02)                  |                          |                                              | 0.90 (0.62-1.26)                                                |
| <b>Type of operation</b>                         |                                   |                          |                                              |                                                                 |
| Rectal resection                                 | 1                                 |                          |                                              | 1                                                               |
| Colonic resection                                | 0.95 (0.85-1.05)                  |                          |                                              | 0.95 (0.83-1.09)                                                |
| Explorative laparotomy or formation of an ostomy | 0.99 (0.89-1.10)                  |                          |                                              | 1.06 (0.91-1.23)                                                |
| Local procedures                                 | 0.65 (0.50-0.83)*                 |                          |                                              | 0.76 (0.57-1.00)*                                               |
| Unknown                                          | 0.33 (0.22-0.48)**                |                          |                                              | 0.48 (0.30-0.75)*                                               |
| <b>Post-operative complications</b>              |                                   |                          |                                              |                                                                 |
| No                                               | 1                                 |                          |                                              | 1                                                               |
| Yes                                              | 0.84 (0.74-0.94)*                 |                          |                                              | 0.82 (0.72-0.92)*                                               |

\*Confounders: Gender, age at time of diagnosis, country of birth, marital status and year of operation

# Depending on year the highest disposal income ranged from 175.500 DKr in 2001 to 299.717 DKr in 2009

Table 4: HR (95% CI) for sickness absence after an episode of work in relation to socioeconomic and clinical factors among 4343 patients aged 18-63 diagnosed with colorectal cancer in the years 2001 to 2009, and part of the work force at time of follow-up.

| WORK → SICKNESS ABSENCE                          | HR - unadjusted<br>(events: 2296) | HR - adjusted for SES | HR - adjusted for SES<br>and confounders* | HR - adjusted for SES,<br>confounders* and<br>clinical variables |
|--------------------------------------------------|-----------------------------------|-----------------------|-------------------------------------------|------------------------------------------------------------------|
| <b>Education</b>                                 |                                   |                       |                                           |                                                                  |
| Primary school                                   | 1                                 | 1                     | 1                                         | 1                                                                |
| Vocational and short education                   | 1.25 (1.11-1.41)*                 | 1.10 (0.96-1.27)      | 1.10 (0.96-1.27)                          | 1.07 (0.93-1.23)                                                 |
| Medium and long education                        | 1.40 (1.26-1.56)**                | 1.22 (1.08-1.38)*     | 1.21 (1.07-1.37)*                         | 1.18 (1.04-1.34)*                                                |
| <b>Disposal income #</b>                         |                                   |                       |                                           |                                                                  |
| Lowest quartile                                  | 1                                 | 1                     | 1                                         | 1                                                                |
| Second lowest quartile                           | 1.18 (1.04-1.33)                  | 1.18 (1.05-1.34)*     | 1.17 (1.03-1.33)                          | 1.13 (0.99-1.28)                                                 |
| Second highest quartile                          | 1.02 (0.91-1.16)                  | 1.04 (0.92-1.18)      | 1.02 (0.90-1.16)                          | 1.00 (0.88-1.14)                                                 |
| Highest quartile                                 | 0.82 (0.73-0.94)*                 | 0.99 (0.87-1.14)      | 0.99 (0.86-1.14)                          | 0.96 (0.84-1.11)                                                 |
| <b>Job type</b>                                  |                                   |                       |                                           |                                                                  |
| Management and knowledge work                    | 0.69 (0.61-0.78)**                | 0.96 (0.83-1.12)      | 0.97 (0.84-1.14)                          | 0.95 (0.82-1.11)                                                 |
| Office and sale (non-manual)                     | 0.89 (0.82-0.98)                  | 1.00 (0.91-1.10)      | 1.00 (0.91-1.12)                          | 1.00 (0.90-1.11)                                                 |
| Manual                                           | 1                                 | 1                     | 1                                         | 1                                                                |
| Other                                            | 0.67 (0.54-0.83)*                 | 0.84 (0.67-1.04)      | 1.00 (0.48-1.82)                          | 1.06 (0.51-1.93)                                                 |
| <b>Previous episodes of work</b>                 | 1.03 (1.03-1.03)**                | 1.02 (1.01-1.04)*     | 1.02 (1.01-1.04)*                         | 1.03 (1.01-1.04)*                                                |
| <b>Previous episodes of sickness absence</b>     | 1.10 (1.09-1.11)**                | 1.08 (1.06-1.09)**    | 1.08 (1.06-1.09)**                        | 1.08 (1.06-1.09)**                                               |
| <b>Previous episodes of unemployment</b>         | 1.01 (1.01-1.02)*                 | 0.98 (0.97-0.99)*     | 0.98 (0.97-0.99)*                         | 0.98 (0.97-0.99)*                                                |
| <b>Type of cancer</b>                            |                                   |                       |                                           |                                                                  |
| Colonic                                          | 1                                 |                       |                                           | 1                                                                |
| Rectal                                           | 1.10 (1.01-1.19)                  |                       |                                           | 1.17 (1.03-1.32)*                                                |
| <b>Stage</b>                                     |                                   |                       |                                           |                                                                  |
| I                                                | 1                                 |                       |                                           | 1                                                                |
| II                                               | 0.97(0.74-1.25)                   |                       |                                           | 0.99(0.75-1.28)                                                  |
| III                                              | 1.29 (1.16-1.41)*                 |                       |                                           | 1.24 (1.11-1.37)*                                                |
| IV                                               | 1.63 (1.40-1.88)**                |                       |                                           | 1.52 (1.21-1.91)*                                                |
| Unknown                                          | 1.11 (0.98-1.25)                  |                       |                                           | 1.08 (0.91-1.29)                                                 |
| <b>Co-morbidity</b>                              |                                   |                       |                                           |                                                                  |
| No                                               | 1                                 |                       |                                           | 1                                                                |
| Yes                                              | 0.99 (0.90-1.08)                  |                       |                                           | 1.05 (0.96-1.16)                                                 |
| <b>ASA</b>                                       |                                   |                       |                                           |                                                                  |
| I                                                | 1                                 |                       |                                           | 1                                                                |
| II                                               | 1.09 (1.00-1.19)                  |                       |                                           | 1.09 (0.99-1.20)                                                 |
| ->III                                            | 1.42 (1.12-1.75)*                 |                       |                                           | 1.33 (1.05-1.67)*                                                |
| Unknown                                          | 1.02 (0.85-1.21)                  |                       |                                           | 0.92 (0.70-1.19)                                                 |
| <b>Curative operation</b>                        |                                   |                       |                                           |                                                                  |
| Yes                                              | 1                                 |                       |                                           | 1                                                                |
| No                                               | 1.43 (1.26-1.61)**                |                       |                                           | 1.35 (1.11-1.63)*                                                |
| Unknown                                          | 1.05 (0.87-1.29)                  |                       |                                           | 1.07 (0.77-1.45)                                                 |
| <b>Type of operation</b>                         |                                   |                       |                                           |                                                                  |
| Rectal resection                                 | 1                                 |                       |                                           | 1                                                                |
| Colonic resection                                | 1.0 (0.91-1.11)                   |                       |                                           | 1.10 (0.97-1.25)                                                 |
| Explorative laparotomy or formation of an ostomy | 0.91 (0.82-1.01)                  |                       |                                           | 1.05 (0.91-1.22)                                                 |
| Local procedures                                 | 0.72 (0.56-0.91)*                 |                       |                                           | 0.78 (0.60-1.01)                                                 |
| Unknown                                          | 0.93 (0.66-1.26)                  |                       |                                           | 0.81 (0.53-1.20)                                                 |
| <b>Post-operative complications</b>              |                                   |                       |                                           |                                                                  |
| No                                               | 1                                 |                       |                                           | 1                                                                |
| Yes                                              | 1.18 (1.05-1.31)*                 |                       |                                           | 1.25 (1.11-1.41)*                                                |

\*Confounders: Gender, age at time of diagnosis, country of birth, marital status and year of operation

# Depending on year the highest disposal income ranged from 175.500 DKr in 2001 to 299.717 DKr in 2009

Table 5: HR (95% CI) for retirement in relation to socioeconomic and clinical factors among 4343 patients aged 18-63 diagnosed with colorectal cancer in the years 2001 to 2009, and part of the work force at time of follow-up.

| Mutually adjusted and controlled for confounders* | HR for transition from sickness absence -> retirement (number of events:569) | HR for transition from work / unemployed -> retirement (number of events: 109) |
|---------------------------------------------------|------------------------------------------------------------------------------|--------------------------------------------------------------------------------|
| <b>Status</b>                                     |                                                                              |                                                                                |
| Working                                           | ---                                                                          | 1                                                                              |
| Unemployed                                        |                                                                              | 5.89 (3.46-10.03)**                                                            |
| <b>Education</b>                                  |                                                                              |                                                                                |
| Primary school                                    | 1                                                                            | 1                                                                              |
| Vocational and short education                    | 1.13 (0.85-1.51)                                                             | 1.29 (0.65-2.69)                                                               |
| Medium and long education                         | 1.06 (0.81-1.41)                                                             | 1.24 (0.64-2.53)                                                               |
| <b>Disposal income #</b>                          |                                                                              |                                                                                |
| Lowest quartile                                   | 1                                                                            | 1                                                                              |
| Second lowest quartile                            | 0.95 (0.76-1.19)                                                             | 0.49 (0.27-0.85)*                                                              |
| Second highest quartile                           | 0.77 (0.60-0.98)*                                                            | 0.47 (0.25-0.83)*                                                              |
| Highest quartile                                  | 0.79 (0.60-1.04)                                                             | 0.29 (0.14-0.57)*                                                              |
| <b>Job type</b>                                   |                                                                              |                                                                                |
| Management and knowledge work                     | 0.59 (0.42-0.82)*                                                            | 0.93 (0.85-1.03)                                                               |
| Office and sale (non-manual)                      | 0.72 (0.580.89)*                                                             | 0.96 (0.86-1.06)                                                               |
| Manual                                            | 1                                                                            | 1                                                                              |
| Other                                             | 1.05 (0.06-4.85)                                                             | 0.38 (0.12-1.37)                                                               |
| <b>Previous episodes of work</b>                  | 0.98 (0.95-1.00)                                                             | 0.93 (0.85-1.03)                                                               |
| <b>Previous episodes of sickness absence</b>      | 1.00 (0.97-1.02)                                                             | 0.96 (0.86-1.06)                                                               |
| <b>Previous episodes of unemployment</b>          | 1.03 (1.00-1.05)*                                                            | 1.02 (0.94-1.11)                                                               |
| <b>Type of cancer</b>                             |                                                                              |                                                                                |
| Colonic                                           | 1                                                                            | 1                                                                              |
| Rectal                                            | 1.32 (1.04-1.67)*                                                            | 1.33 (0.75-2.34)                                                               |
| <b>Stage</b>                                      |                                                                              |                                                                                |
| I                                                 | 1                                                                            | 1                                                                              |
| II                                                | 0.85 (0.46-1.46)                                                             | 1.70 (0.49-4.51)                                                               |
| III                                               | 1.13 (0.89-1.44)                                                             | 1.91 (1.15-3.21)*                                                              |
| IV                                                | 1.58 (1.04-2.42)*                                                            | 2.30 (0.88-6.14)                                                               |
| Unknown                                           | 1.01 (0.68-1.50)                                                             | 1.72 (0.82-3.59)                                                               |
| <b>Comorbidity</b>                                |                                                                              |                                                                                |
| No                                                | 1                                                                            | 1                                                                              |
| Yes                                               | 1.03 (0.85-1.24)                                                             | 1.17 (0.76-1.77)                                                               |
| <b>ASA</b>                                        |                                                                              |                                                                                |
| I                                                 | 1                                                                            | 1                                                                              |
| II                                                | 1.31 (1.08-1.58)*                                                            | 1.56 (1.00-2.44)*                                                              |
| III                                               | 2.16 (1.49-3.06)*                                                            | 2.57 (1.03-5.75)*                                                              |
| Unknown                                           | 1.29 (0.76-2.09)                                                             | 1.64 (0.50-4.24)                                                               |
| <b>Curative operation</b>                         |                                                                              |                                                                                |
| Yes                                               | 1                                                                            | 1                                                                              |
| No                                                | 1.30 (0.89-1.86)                                                             | 1.80 (0.77-3.84)                                                               |
| Unknown                                           | 1.41 (0.75-2.51)                                                             | 1.05 (0.19-4.01)                                                               |
| <b>Type of operation</b>                          |                                                                              |                                                                                |
| Rectal resection                                  | 1                                                                            | 1                                                                              |
| Colonic resection                                 | 1.42 (1.11-1.81)*                                                            | 1.36 (0.74-2.51)                                                               |
| Explorative laparotomy or formation of an ostomy  | 1.06 (0.78-1.43)                                                             | 1.23 (0.55-2.32)                                                               |
| Local procedures                                  | 1.01 (0.53-1.84)                                                             | 0.39 (0.08-1.26)                                                               |
| Unknown                                           | 1.45 (0.93-2.18)                                                             | 0.84 (0.16-3.13)                                                               |
| <b>Post-operative complications</b>               |                                                                              |                                                                                |
| No                                                | 1                                                                            | 1                                                                              |
| Yes                                               | 1.23 (1.00-1.51)*                                                            | 0.86 (0.47-1.46)                                                               |

\*Confounders: Gender, age at time of diagnosis, country of birth, marital status and year of operation

# Depending on year the highest disposal income ranged from 175.500 DKr in 2001 to 299.717 DKr in 2009

## Reference List

- 1  
2  
3  
4  
5  
6  
7  
8  
9  
10  
11  
12  
13  
14  
15  
16  
17  
18  
19  
20  
21  
22  
23  
24  
25  
26  
27  
28  
29  
30  
31  
32  
33  
34  
35  
36  
37  
38  
39  
40  
41  
42  
43  
44  
45  
46  
47  
48  
49  
50  
51  
52  
53  
54  
55  
56  
57  
58  
59  
60
- (1) Ferlay J, Parkin DM, Steliarova-Foucher E. Estimates of cancer incidence and mortality in Europe in 2008. *Eur J Cancer* 2010; 46(4):765-781.
- (2) Coleman MP, Forman D, Bryant H, Butler J, Rachet B, Maringe C et al. Cancer survival in Australia, Canada, Denmark, Norway, Sweden, and the UK, 1995-2007 (the International Cancer Benchmarking Partnership): an analysis of population-based cancer registry data. *Lancet* 2011; 377(9760):127-138.
- (3) Brenner H, Bouvier AM, Foschi R, Hackl M, Larsen IK, Lemmens V et al. Progress in colorectal cancer survival in Europe from the late 1980s to the early 21st century: The EURO CARE study. *Int J Cancer* 2011.
- (4) Gordon L, Lynch BM, Newman B. Transitions in work participation after a diagnosis of colorectal cancer. *Aust N Z J Public Health* 2008; 32(6):569-574.
- (5) van den Brink M, van den Hout WB, Kievit J, Marijnen CA, Putter H, van de Velde CJ et al. The impact of diagnosis and treatment of rectal cancer on paid and unpaid labor. *Dis Colon Rectum* 2005; 48(10):1875-1882.
- (6) Frederiksen BL, Osler M, Harling H, Ladelund S, Jorgensen T. The impact of socioeconomic factors on 30-day mortality following elective colorectal cancer surgery: a nationwide study. *Eur J Cancer* 2009; 45(7):1248-1256.
- (7) Cavalli-Bjorkman N, Lambe M, Eaker S, Sandin F, Glimelius B. Differences according to educational level in the management and survival of colorectal cancer in Sweden. *Eur J Cancer* 2011; 47(9):1398-1406.
- (8) Egeberg R, Halkjaer J, Rottmann N, Hansen L, Holten I. Social inequality and incidence of and survival from cancers of the colon and rectum in a population-based study in Denmark, 1994-2003. *Eur J Cancer* 2008; 44(14):1978-1988.
- (9) Aarts MJ, Lemmens VEPP, Louwman MWJ, Kunst AE, Coebergh JW. Socioeconomic status and changing inequalities in colorectal cancer? A review of the associations with risk, treatment and outcome. *European Journal of Cancer* 2010; 46(15):2681-2695.
- (10) Drolet M, Maunsell E, Brisson J, Brisson C, Masse B, Deschenes L. Not Working 3 Years After Breast Cancer: Predictors in a Population-Based Study. *J Clin Oncol* 2005; 23(33):8305-8312.
- (11) Steiner JF, Cavender TA, Nowels CT, Beaty BL, Bradley CJ, Fairclough DL et al. The impact of physical and psychosocial factors on work characteristics after cancer. *Psychooncology* 2008; 17(2):138-147.
- (12) Paraponaris A, Teyssier LS, Ventelou B. Job tenure and self-reported workplace discrimination for cancer survivors 2 years after diagnosis: does employment legislation matter? *Health Policy* 2010; 98(2-3):144-155.

- 1  
2  
3  
4 (13) Earle CC, Chretien Y, Morris C, Ayanian JZ, Keating NL, Polgreen LA et al. Employment  
5 among survivors of lung cancer and colorectal cancer. *J Clin Oncol* 2010; 28(10):1700-  
6 1705.  
7  
8 (14) Spelten ER, Sprangers MA, Verbeek JH. Factors reported to influence the return to work of  
9 cancer survivors: a literature review  
10 1. *Psychooncology* 2002; 11(2):124-131.  
11  
12 (15) Short PF, Vasey JJ, Tunceli K. Employment pathways in a large cohort of adult cancer  
13 survivors. *Cancer* 2005; 103(6):1292-1301.  
14  
15 (16) Mehnert A. Employment and work-related issues in cancer survivors. *Crit Rev Oncol*  
16 *Hematol* 2011; 77(2):109-130.  
17  
18 (17) Dalton SO, Steding-Jessen M, Gislum M, Frederiksen K, Engholm G, Schüz J. Social  
19 inequality and incidence and survival of cancer in a population based study in Denmark,  
20 1994-2003: Aims, background and methods. *Eur J Cancer* 2008; x:xx.  
21  
22 (18) Amir Z, Moran T, Walsh L, Iddenden R, Luker K. Return to paid work after cancer: a British  
23 experience. *J Cancer Surviv* 2007; 1(2):129-136.  
24  
25 (19) Carlsen K, Dalton SO, Frederiksen K, Diderichsen F, Johansen C. Cancer and the risk for  
26 taking early retirement pension:  
27 A Danish cohort study. *Scandinavian Journal of Public Health* 2008; 36(2):117-125.  
28  
29 (20) Mols F, Thong MS, Vissers P, Nijsten T, van de Poll-Franse LV. Socio-economic  
30 implications of cancer survivorship: Results from the PROFILES registry. *Eur J Cancer*  
31 2011.  
32  
33 (21) Sjøvall K, Attner B, Englund M, Lithman T, Noreen D, Gunnars B et al. Sickness absence  
34 among cancer patients in the pre-diagnostic and the post-diagnostic phases of five common  
35 forms of cancer. *Support Care Cancer* 2012; 20(4):741-747.  
36  
37 (22) Syse A, Tretli S, Kravdal O. Cancer's impact on employment and earnings--a population-  
38 based study from Norway. *J Cancer Surviv* 2008; 2(3):149-158.  
39  
40 (23) Frederiksen BL, Osler M, Harling H, Ladelund S, Jorgensen T. Do patient characteristics,  
41 disease, or treatment explain social inequality in survival from colorectal cancer? *Soc Sci*  
42 *Med* 2009; 69(7):1107-1115.  
43  
44 (24) Statistics Denmark. IDA - an integrated data base for labour market research. Main report,  
45 1991 . 2006.  
46  
47 Ref Type: Generic  
48  
49 (25) Lyng E, Sandegaard JL, Rebolj M. The Danish National Patient Register. *Scand J Public*  
50 *Health* 2011; 39(7 Suppl):30-33.  
51  
52 (26) Kildemoes HW, Sorensen HT, Hallas J. The Danish National Prescription Registry. *Scand J*  
53 *Public Health* 2011; 39(7 Suppl):38-41.  
54  
55  
56  
57  
58  
59  
60

- 1  
2  
3  
4 (27) Hjollund NH, Larsen FB, Andersen JH. Register-based follow-up of social benefits and  
5 other transfer payments: accuracy and degree of completeness in a Danish interdepartmental  
6 administrative database compared with a population-based survey. *Scand J Public Health*  
7 2007; 35(5):497-502.  
8  
9 (28) Pedersen J, Bjorner JB, Burr H, Christensen KB. Transitions between sickness absence,  
10 work, unemployment, and disability in Denmark 2004-2008. *Scand J Work Environ Health*  
11 2012.  
12  
13 (29) Sanchez KM, Richardson JL, Mason HR. The return to work experiences of colorectal  
14 cancer survivors. *AAOHN J* 2004; 52(12):500-510.  
15  
16 (30) Taskila T, Martikainen R, Hietanen P, Lindbohm ML. Comparative study of work ability  
17 between cancer survivors and their referents. *Eur J Cancer* 2007; 43(5):914-920.  
18  
19 (31) Mols F, Thong MS, Vreugdenhil G, van de Poll-Franse LV. Long-term cancer survivors  
20 experience work changes after diagnosis: results of a population-based study.  
21 *Psychooncology* 2009; 18(12):1252-1260.  
22  
23 (32) Rodriguez-Bigas MA, Chang GJ, Skibber JM. Barriers to rehabilitation of colorectal cancer  
24 patients. *J Surg Oncol* 2007; 95(5):400-408.  
25  
26  
27  
28  
29  
30  
31  
32  
33  
34  
35  
36  
37  
38  
39  
40  
41  
42  
43  
44  
45  
46  
47  
48  
49  
50  
51  
52  
53  
54  
55  
56  
57  
58  
59  
60



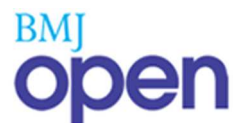

**The transition between work, sickness absence and pension  
in a cohort of Danish colorectal cancer survivors**

|                                 |                                                                                                                                                                                                                                                                                                                                                                                                                      |
|---------------------------------|----------------------------------------------------------------------------------------------------------------------------------------------------------------------------------------------------------------------------------------------------------------------------------------------------------------------------------------------------------------------------------------------------------------------|
| Journal:                        | <i>BMJ Open</i>                                                                                                                                                                                                                                                                                                                                                                                                      |
| Manuscript ID:                  | bmjopen-2012-002259.R1                                                                                                                                                                                                                                                                                                                                                                                               |
| Article Type:                   | Research                                                                                                                                                                                                                                                                                                                                                                                                             |
| Date Submitted by the Author:   | 20-Dec-2012                                                                                                                                                                                                                                                                                                                                                                                                          |
| Complete List of Authors:       | Carlsen, Kathrine; Glostrup University Hospital, Research Centre for Prevention and Health<br>Harling, Henrik; Bispebjerg University Hospital, Department of Surgery<br>Pedersen, Jacob; National Research Centre for the Working Environment,<br>Christensen, Karl; University of Copenhagen, Department of Biostatistics<br>Osler, Merete; Glostrup University Hospital, Research Centre for Prevention and Health |
| <b>Primary Subject Heading</b>: | Oncology                                                                                                                                                                                                                                                                                                                                                                                                             |
| Secondary Subject Heading:      | Epidemiology                                                                                                                                                                                                                                                                                                                                                                                                         |
| Keywords:                       | EPIDEMIOLOGY, Gastrointestinal tumours < ONCOLOGY, SOCIAL MEDICINE                                                                                                                                                                                                                                                                                                                                                   |
|                                 |                                                                                                                                                                                                                                                                                                                                                                                                                      |

SCHOLARONE™  
Manuscripts

1  
2  
3  
4  
5  
6  
7  
8  
9  
10  
11  
12  
13  
14  
15  
16  
17  
18  
19  
20  
21  
22  
23  
24  
25  
26  
27  
28  
29  
30  
31  
32  
33  
34  
35  
36  
37  
38  
39  
40  
41  
42  
43  
44  
45  
46  
47  
48  
49  
50  
51  
52  
53  
54  
55  
56  
57  
58  
59  
60

1 The transition between work, sickness absence and pension in a cohort of Danish colorectal cancer  
2 survivors.

3  
4 BY

5 Kathrine Carlsen, MSc, MPH, PhD\*<sup>1</sup>

6 Henrik Harling, MD, Clinical Doctor<sup>2</sup>

7 Jacob Pedersen, MSc, Statistician<sup>3</sup>

8 Karl Bang Christensen, Statistician<sup>4</sup>

9 Merete Osler, MD, Professor<sup>5</sup>

10  
11  
12  
13  
14  
15 **E-mail addresses and affiliations:**

16 \* Corresponding author; kathrine.carlsen@regionh.dk, phone: +45 38633384, Fax: +45 38633977

17 1: kathrine.carlsen@regionh.dk. Research Centre for Prevention and Health, Glostrup University  
18 Hospital, 2600 Glostrup, Denmark

19 2: hhar0002@bbh.regionh.dk. Department of Surgery, Bispebjerg University Hospital, 2400  
20 Copenhagen, Denmark

21 3: jpe@nrcwe.dk. National Research Centre for the Working Environment, 2100 Copenhagen,  
22 Denmark

23 4: kach@sund.ku.dk. Department of Biostatistics, University of Copenhagen, 1014 Copenhagen K,  
24 Denmark

25 5: merete.osler@regionh.dk. Research Centre for Prevention and Health, Glostrup University  
26 Hospital, 2600 Glostrup, Denmark

27  
28 Number of words: 3291

29 Abstract: 300 words

30 Number of references: 37

31 Number of figures: 2

32 Number of tables: 5

1  
2  
3  
4 **Abstract**

5 Objectives: The aim of this study was to evaluate the impact of socioeconomic and clinical factors  
6  
7  
8 on the transitions between work, sickness absence and retirement in a cohort of Danish colorectal  
9  
10 cancer survivors.

11  
12 Design: Register based cohort study with up to 10 years of follow-up.

13  
14  
15 Setting: Population based study with use of administrative health related and socioeconomic  
16  
17 registers.

18  
19  
20  
21  
22  
23  
24 Participants: All persons (N=4343) diagnosed with colorectal cancer in Denmark in the years 2001-  
25  
26 2009 while they were in their working age (18-63 years) and who were part of the labor force one  
27  
28 year post diagnosis.

29  
30  
31  
32  
33  
34  
35  
36  
37  
38  
39  
40  
41  
42  
43  
44  
45  
46  
47  
48  
49  
50  
51  
52  
53  
54  
55  
56  
57  
58  
59  
60  
Primary and secondary outcome measures: By use of multi-state models in Cox proportional  
hazards models we analyzed the hazard ratio for re-employment, sickness absence and retirement in  
models including clinical as well as health related variables.

Results: One year after diagnosis 62% were working and 58% continued until end of follow-up.  
Socioeconomic factors were found to be associated with retirement but not with sickness absence  
and return to work. The risk for transition from work to sickness absence was increased if the  
disease was diagnosed at a later stage (stage III) 1.52 (95% CI: 1.21-1.91), not operated curatively  
1.35 (95% CI: 1.11-1.63) and with occurrence of post-operative complications 1.25 (95% CI: 1.11-  
1.41). The opposite was found for the transition from sickness absence back to work.

Conclusion: This nationwide study of colorectal cancer patients who have survived one year shows  
that stage of disease, general health state of the individual, post-operative complications and the  
history of sickness absence and unemployment have an impact on the transition between work,  
sickness absence and disability pension. This leads to an increased focus on the rehabilitation  
process for the more vulnerable persons who have a combination of severe disease and a history of  
work related problems with episodes outside the working market.

1  
2  
3  
4  
5  
6  
7  
8  
9  
10  
11  
12  
13  
14  
15  
16  
17  
18  
19  
20  
21  
22  
23  
24  
25  
26  
27  
28  
29  
30  
31  
32  
33  
34  
35  
36  
37  
38  
39  
40  
41  
42  
43  
44  
45  
46  
47  
48  
49  
50  
51  
52  
53  
54  
55  
56  
57  
58  
59  
60

1

**2 Article summary****3 Article focus:**

- 4 • How many colorectal cancer survivors return to work, stay at sickness absence, get unemployed
- 5 or become pensioners in the years following diagnosis?
- 6 • Does socioeconomic position or clinical factors predict re-employment, sickness absence,
- 7 unemployment or pension in this cohort?

**8 Key messages:**

- 9 • First study to differentiate between re-employment, sickness absence, unemployment and
- 10 retirement in a cohort of colorectal cancer survivors.
- 11 • One year after diagnosis 62% had resumed work.
- 12 • Socioeconomic factors were associated with early retirement whereas clinical factors were
- 13 found to be associated with sickness absence and re-employment.

**14 Strengths and limitations:**

- 15 • This is a longitudinal nationwide population based study including more than 4000 persons
- 16 diagnosed with colorectal cancer.
- 17 • The study identifies an association between socioeconomic position / clinical factors and re-
- 18 employment / sickness absence / pension but is not able to identify mechanisms behind.

19

**20 What is new in this paper:**

21 Very few studies have analyzed the impact colorectal cancer has on the affiliation to the labor  
22 market. In this study we are able to identify clinical and socioeconomic risk factors for sickness  
23 absence, work resumption and retirement.

## 1. Introduction

In 2008 nearly 500.000 persons in Europe were diagnosed with colorectal cancer making it the most common cancer and the second most common cause of cancer deaths in Europe<sup>1</sup>. From 1995 to 2007 the survival from colorectal cancer has steadily improved among all age groups<sup>2</sup> and the relative 5-year survival increased in the years 1990 to 2002 from 50% to 60% among persons aged 15 to 59 years<sup>3</sup>.

Throughout Europe life expectancy has increased leading to higher age at pension and longer time in the workforce. As the risk of colorectal cancer increases with age, it can be expected that still more persons will be diagnosed with colorectal cancer while they are an active part of the workforce.

Few studies have analyzed the impact of colorectal cancer on work participation in the years following diagnosis and treatment. The existing studies reported that 2/3 of those working at time of diagnosis resume work in the years after treatment. Risk factors for work cessation were high age; radiation therapy and co-morbidity<sup>4;5</sup>. Several studies<sup>6-9</sup> have shown a negative social gradient in survival of colorectal cancer, but the social consequences has not been studied despite the fact that a negative social gradient in return to work has been observed among cancer survivors in general<sup>10-17</sup>.

Compared to persons diagnosed with testicular-, breast-, endocrine- or skin cancer patients with colorectal cancer had a higher risk of not resuming work and had longer time on sickness absence<sup>13;18-22</sup>.

In order to get a better understanding of the occupational consequences of colorectal cancer it is important to take both socioeconomic and health related factors into account and to differentiate more specifically between the different reasons for not working. In the majority of studies the outcome is 'not returning to work' which is a mix-up of different reasons for not working, i.e.

1  
2  
3  
4  
5  
6  
7  
8  
9  
10  
11  
12  
13  
14  
15  
16  
17  
18  
19  
20  
21  
22  
23  
24  
25  
26  
27  
28  
29  
30  
31  
32  
33  
34  
35  
36  
37  
38  
39  
40  
41  
42  
43  
44  
45  
46  
47  
48  
49  
50  
51  
52  
53  
54  
55  
56  
57  
58  
59  
60

1 unemployment, sickness absence or disability pension and the transition from a cancer diagnosis to  
2 one of these outcomes could very well differ according to different risk factors.

3 These transitions between different states (e.g. from sickness absence to work, or from sickness  
4 absence to disability) can be modeled by using multi-state models<sup>23</sup>. Multi-state models are well-  
5 known statistical models used for event history analysis, e.g. the study of survival. The application  
6 of statistical models for survival analysis in the analysis of sickness absence is relatively new<sup>24;25</sup>  
7 and the use of multi-state models is mainly due to Lie et al<sup>26</sup>, but multi-state models have also been  
8 applied by other researchers<sup>27;28</sup>.

9 By use of detailed, nationwide, population based registers the aim of this study is to evaluate the  
10 impact of both socioeconomic and clinical factors on the transitions between work, sickness  
11 absence and retirement in a cohort of colorectal cancer survivors and to test for interaction between  
12 clinical and socioeconomic factors.

## 13 14 **2. Materials and methods**

15 This study is based on Danish population based registers linked together with the unique personal  
16 identification code given to all Danish residents.

### 17 18 *Danish Colorectal Cancer Group (DCCG)*

19 The study population was derived from the national database of DCCG which includes around 93%  
20 of patients in Denmark with a first-time adenocarcinoma of the rectum (ICD-10: C20) or colon  
21 (ICD-C18). This database comprises prospectively collected data registered by surgeons. The  
22 database has previously been used in epidemiological studies and is described in details elsewhere  
23 <sup>29</sup>. From the database we obtained clinical data with relevance for the probability of returning to  
24 work after treatment. Entry into the study was equal to date of surgery and was used to calculate the

1  
2  
3  
4 1 follow-up time. Variables describing the disease were cancer type and tumor stage classified  
5  
6 2 according to the International Union Against Cancer (UICC). Information about surgical procedure  
7  
8 3 was included as curative operation (yes/no) and type of operation (1=rectal resection, 2=colonic  
9  
10 4 resection, 3=explorative laparotomy or formation of an ostomy, 4=local procedures). Health status  
11  
12 5 at time of surgery was measured by ASA score (according to the American Society of  
13  
14 6 Anesthesiologists) where patients are categorized into five subgroups by preoperative physical  
15  
16 7 fitness reaching from I - A completely healthy patient to V - A moribund patient who is not expected  
17  
18 8 to live 24 hours with or without surgery. ASA score III-V was collapsed into one group of patients  
19  
20 9 with severe systemic diseases. Postoperative complications were grouped as no complications or  
21  
22 10 one or more complications. The latter group included postoperative bleeding, problems with the  
23  
24 11 ostomy, intra-abdominal infections or infections in the wound, lack of passage through the intestine,  
25  
26 12 leak from the intestine or postoperative rupture of the wound.  
27  
28  
29  
30  
31  
32

### 33 *Statistics Denmark*

34  
35 15 Information on a number of demographic and socioeconomic characteristics was obtained from the  
36  
37 16 population-based Integrated Database for Labour Market Research (IDA), which has been  
38  
39 17 administrated by Statistics Denmark since 1980<sup>30</sup>. From IDA we had information about country of  
40  
41 18 origin (grouped as born in Denmark or born outside Denmark) and marital status (married or  
42  
43 19 cohabiting, single including widows and unknown). Education was classified according to length of  
44  
45 20 study (primary school 9-12 years of education, vocational and short education 13-15 years, medium  
46  
47 21 and long education more than 16 years and unknown). Job type was classified as management and  
48  
49 22 knowledge work (e.g. leaders, doctors and teachers at high school), office and sale (e.g. secretary,  
50  
51 23 police and nurses) and manual work (e.g. farmers, craftsmen and social and health care assistants).  
52  
53 24 In order to obtain information on disposal income for the family we also identified partners and  
54  
55  
56  
57  
58  
59  
60

1  
2  
3  
4  
5  
6  
7  
8  
9  
10  
11  
12  
13  
14  
15  
16  
17  
18  
19  
20  
21  
22  
23  
24  
25  
26  
27  
28  
29  
30  
31  
32  
33  
34  
35  
36  
37  
38  
39  
40  
41  
42  
43  
44  
45  
46  
47  
48  
49  
50  
51  
52  
53  
54  
55  
56  
57  
58  
59  
60

1 their income. Disposal income was calculated as the average of the family income three years

2 before the year of diagnosis and was deflated according to the 2000 value of the Danish kroner.

3 Education, job type and disposal income were combined under the heading socioeconomic status

4 (SES).

#### 6 *The Danish National Patient Registry (NPR)*

7 This register holds information on all hospitalizations and outpatient visits in Denmark since 1978.

8 In this study we used information of date of admission and discharge and diagnosis coded according  
9 to *the International Classifications of Diseases (ICD-10)*<sup>31</sup>.

#### 11 *The Register of Medical Product Statistics (RMPS)*

12 Since 1995 every medical product sold on prescription by Danish pharmacies has been registered.

13 From this register we had information on date for redemption of the prescription and substance  
14 classified according to the *anatomical-therapeutic-chemical (ATC)* system<sup>32</sup>.

16 Co-morbidity preceding five years before the year of diagnosis was obtained from NPR and RMPS.

17 As comorbidity we included cardiovascular disease, chronic obstructive pulmonary disease,  
18 diabetes and liver, kidney or connective tissue diseases – diseases which are all part of the Charlson  
19 index. Comorbidity was stated if one or more of these diseases were present at time of diagnosis.

#### 21 *Register based Evaluation of Marginalization (DREAM)*

22 The Danish labor market is characterized as a flexicurity system with a high degree of economic  
23 compensation in case of unemployment or reduced work ability (security) but also with a high  
24 turnover rate (flexible). Unemployed persons are warranted economic compensation if they are



1 actively seeking job. During the study period it was possible to receive a maximum of four years of  
2 unemployment benefit. After the end of these four years or if a person is not qualified for  
3 unemployment benefit (i.e. not member of a union) it is possible to receive social income. If a  
4 person is unable to work due to illness or disability it is possible to receive sickness benefit for a  
5 maximum of 52 weeks during a period of two years or apply for early retirement if the work ability  
6 is reduced to a level where it is not possible to hold a job. This holds for all Danish citizens  
7 independent of job type. During the study period the retirement age was 64 years of age.  
8 The outcome of the study was receipt of social transfer payments or in work. Information about  
9 social transfer payments was obtained from the Danish population based administrative register  
10 DREAM. DREAM covers all residents in Denmark who have received social transfer payments  
11 from the state<sup>33</sup> in any given week since 1991. In the present study we included data from DREAM  
12 from week 1 in 2001 until week 13 in 2011. In work was defined as not receiving any social transfer  
13 payments for six consecutive weeks. Transfer income obtained from DREAM was divided into  
14 sickness benefit, unemployment benefit and permanent withdrawal from the workforce due to early  
15 retirement pension or post-employment benefit, which is an optional withdraw from the workforce  
16 not caused by disability.

### 17 18 *Study population*

19 In the years 2001 to 2009 31.570 persons were diagnosed with colorectal cancer in Denmark. The  
20 majority of these persons were diagnosed after the age of retirement and the study population  
21 consists of 4.343 persons aged 18-63 years, who were part of the workforce and survived the first  
22 postoperative year (fig. 2). The follow-up period of this population was between 65 weeks (for  
23 persons diagnosed in the last week of 2009) to 535 week (for persons diagnosed in the first week of  
24 2001) leading to 12.569 person years.

1

2 *Outcome data*

3 For every person in the study population labour market status was recorded on a weekly basis until  
4 the person reached the age limit of 63 years, emigrated, died, or until the end of follow-up  
5 whichever came first. Labour market status was categorized in four different 'states': work,  
6 sickness absence, unemployment, and disability. The multi-state model is a model for the nine  
7 possible transitions between these four states (Figure 1).

8

9 *Statistical analysis*

10 Descriptive analysis by use of  $\chi^2$  and t-tests was conducted in order to examine the characteristics  
11 of the sample. The outcome data was recoded and for each person time spent in one of the four  
12 states was registered. Furthermore it was registered if a transition to another state occurred at the  
13 end of the persons stay in the state, and, if so, what state the person shifted to. The time spent in the  
14 state was censored if the person died, emigrated, or shifted to a social transfer payment that did not  
15 fit any of the four states.

16

17 Each of the nine possible transitions shown in Figure 1 was analysed using the Cox proportional  
18 hazards model in SAS (The PHREG procedure, SAS version 9.2). The time scale used was duration  
19 of stay in current state.

20 The variables education, disposal income, job type, type of cancer, cancer stage, comorbidity, ASA  
21 score, curative operation, type of operation, post-operative complications were included as time  
22 constant covariates. Three time dependent covariates were also included: number of times the  
23 person been employed, had been sick-listed, or unemployment since the start of follow up.

24

25

26

27

28

29

30

31

32

33

34

35

36

37

38

39

40

41

42

43

44

45

46

47

48

49

50

51

52

53

54

55

56

57

58

59

60

1  
2  
3  
4 1 Because the baseline hazard for each state was allowed to vary freely, the covariate relied on the  
5  
6 2 assumption of proportionality.  
7  
8 3

### 4 **3. Results**

5 Table 1 shows the baseline characteristics for all patients stratified on those excluded during the  
6  
7 6 first year after diagnosis (N=1689) and the study population (N=4343). Compared to the excluded  
8  
9 7 population the study population was diagnosed with significantly less severe disease and higher  
10  
11 8 SES at time of inclusion.

12  
13 9 One year after operation 62% of the study population were in work while 32% were sick listed and  
14  
15 10 6% were unemployed (Table 2). Of those who were working, 58% continued working for an  
16  
17 11 average of 136 weeks.

18  
19 12 Table 3 and 4 shows the Hazard Ratio (HR) for transitions between work and sickness absence and  
20  
21 13 reverse. Previous periods of sickness absence and unemployment reduced the rate of returning to  
22  
23 14 work with 7% and 12% per episode, whereas previous episodes of work increased the rate of both  
24  
25 15 work and sickness absence. In addition, we found that increasing levels of education increased the  
26  
27 16 rate of transition from work back to sickness absence.

28  
29 17 Return to work after a period of sickness absence (Table 3) was less common among cancer  
30  
31 18 survivors who were operated in an advanced stage of disease, who did not have curative surgery  
32  
33 19 and who suffered postoperative complications.

34  
35 20 Sickness absence following a period of work was primarily associated with disease related factors  
36  
37 21 (Table 4). In contrast to return to work, patients diagnosed with rectal cancer had an increased risk  
38  
39 22 for sickness absence (HR=1.17 (1.03-1.32)) compared to those operated for colonic cancer.

40  
41 23 Furthermore we found that an ASA score on III increased the risk for sickness absence with almost  
42  
43 24 40%.

1  
2  
3  
4  
5  
6  
7  
8  
9  
10  
11  
12  
13  
14  
15  
16  
17  
18  
19  
20  
21  
22  
23  
24  
25  
26  
27  
28  
29  
30  
31  
32  
33  
34  
35  
36  
37  
38  
39  
40  
41  
42  
43  
44  
45  
46  
47  
48  
49  
50  
51  
52  
53  
54  
55  
56  
57  
58  
59  
60

1 The risk factors associated with permanently withdrawal from the labor market one year after  
2 operation are shown in Table 5. Since the transition from work and unemployment to retirement  
3 follows the same pathways, these groups were joined in order to gain more power. The risk for  
4 retirement was not only related to the disease but also to SES. Manual work and increasing disposal  
5 income reduces the risk for retirement after an episode of sickness absence and work, respectively.  
6 Compared to patients in work, the HR for retirement was 5.89 (3.46-10.03) among unemployed  
7 survivors.  
8 Advanced stage at diagnosis and high ASA score increased the risk for retirement among both  
9 groups.  
10 Finally, we analyzed for effect modification by adding an interaction in the logistic model between  
11 disposal income as the strongest socioeconomic predictor and type of cancer, stage of disease, type  
12 of operation and post-operative complications. We did not find any significant effect modification  
13 between socioeconomic factors and disease related factors (Data not shown).

#### 15 **4. Discussion and conclusion**

16 In this cohort study including 4343 Danish colorectal cancer patients, who were part of the  
17 workforce after the first postoperative year, we found that 62% were working one year after  
18 operation.  
19 One year after operation previous episodes of sickness absence and unemployment, cancer stage at  
20 diagnosis, curative operation and post-operative complications were associated with labor market  
21 affiliation during follow-up whereas SES was only weakly associated with the transition between  
22 the different occupational states.

1 The observed rate of return to work is in accordance with previous studies on colorectal cancer  
2 survivors, where return to full time employment was reported in 60%-89% dependent on time from  
3 diagnosis, definition of return to work and severity of the disease.

4 In this study we decided only to include survivors, who were still part of the workforce one year  
5 after operation, based on a notion that it is not clinical relevant to study full return to work before  
6 the end of a one-year survival period. In this selected group of patients the observed resumption of  
7 work was rather low compared to previous studies where up to 89% of patients had returned to  
8 work at some point after diagnosis<sup>34</sup>. This could be caused by the fact that there is a lack of  
9 consensus regarding definition and measurement of return to work. Thus, in some studies return to  
10 work is simply the number of persons working at time of follow-up divided by the number working  
11 at baseline<sup>10,35</sup>. In other studies return to work is measured among those persons, who are part of  
12 the workforce at time of follow-up, and in still other studies working is self-reported and covers  
13 from one week to permanently re-employed<sup>34</sup>

14 The lack of a clear definition can result in misinterpretation of factors related to the disease and SES  
15 since the underlying mechanisms in the transition from sickness absence back to work or to  
16 disability pension seems to follow different pathways. Leaving the workforce for any type of  
17 pension is an irreversible process and is assigned when work demands exceeds health and mental  
18 resources and is thus dependent on both health and work related factors. On the other hand,  
19 unemployment and sickness absence both include conditions with an expectation of resuming work  
20 and is more related to either SES or health, respectively.

21 The exclusion of persons who take disability pension the first year and the lower social one-year  
22 survival after colorectal cancer among socially deprived might explain our finding of no effect of  
23 SES on work and sickness absence one year after diagnosis of colorectal cancer. It seems as a

1  
2  
3  
4  
5  
6  
7  
8  
9  
10  
11  
12  
13  
14  
15  
16  
17  
18  
19  
20  
21  
22  
23  
24  
25  
26  
27  
28  
29  
30  
31  
32  
33  
34  
35  
36  
37  
38  
39  
40  
41  
42  
43  
44  
45  
46  
47  
48  
49  
50  
51  
52  
53  
54  
55  
56  
57  
58  
59  
60

1 'healthy worker effect' where the most affluent survive the first year without leaving the workforce  
2 for disability pension.

3 In the present study, the transition between work, sickness absence and disability pension one year  
4 after operation was primarily associated with factors related to the cancer disease.

5 The risk for transition from work to sickness absence was increased if the disease was diagnosed at  
6 a later stage, not operated curatively and with occurrence of post-operative complications. The  
7 opposite was found for the transition from sickness absence back to work. The association between  
8 disease related factors and resuming of work after a cancer diagnosis including colorectal cancer  
9 has been observed in other studies where tumor stage<sup>13;36</sup>, treatment<sup>4;36</sup>, physical symptoms<sup>16</sup> and  
10 ASA-score were reported to be negatively associated with return to work.

11 We found that persons diagnosed with rectal cancer had a significant increased risk for sickness  
12 absence and retirement possibly due to the fact that this patient group in contrast to colon cancer  
13 patients more often will have to learn to take care of an ostomy or suffer from abnormal bowel and  
14 urinary function years after the operation<sup>37</sup>. Unfortunately, we could not account for these factors in  
15 our analysis.

### 17 *Strengths and limitations*

18 The present study is based on data from a well-defined clinical database of all Danish colorectal  
19 cancer patients. The database has a high completeness and data validity and missing values are  
20 random and not associated with the outcome under study whereby selection-bias is removed.

21 Variables regarding socioeconomic position and the affiliation to the labour market are  
22 administrative data collected prospectively why recall-bias is eliminated.

23 This study has, however, some limitations. First of all we were not able to include complementary  
24 treatment as chemotherapy and radiation, reduced working hours or job changes in our analysis.

1  
2  
3  
4 1 Complementary cancer treatment can have a negative effect on the physical and psychological work  
5  
6 2 ability and has been shown to be associated with reductions in work hours and reassignment to  
7  
8 3 other work tasks<sup>11;16;36</sup>. We defined return to work as not receiving any transfer payments for six  
9  
10 4 consecutive weeks. This can lead to misclassification of persons leaving the workforce without  
11  
12 5 receiving economic compensation from the state. This is, however, very seldom in Denmark and  
13  
14 6 can be ignored in this study.

15  
16  
17 7 The present study is conducted in a Nordic welfare system with high turnover rates on the labour  
18  
19 8 market, high rates of participation and high degrees of social security. Despite the fact that the  
20  
21 9 expenditures to social protection in the Nordic countries including Denmark is higher compared to  
22  
23 10 the rest of the European Union and countries as US and Canada they all have some degree of social  
24  
25 11 welfare systems and universal health care. The size of economic compensation and duration of  
26  
27 12 sickness absence might have an impact on the consequence of a chronic disease but the risk factors  
28  
29 13 and reasons for being on sickness absence or return to work is not influenced by the political  
30  
31 14 context.

32  
33  
34  
35 15

### 36 37 16 *Conclusion*

38  
39 17 This nationwide study of colorectal cancer patients who have survived one year shows that stage of  
40  
41 18 disease, general health state of the individual (ASA score), post-operative complications and the  
42  
43 19 history of sickness absence and unemployment have an impact on the transition between work,  
44  
45 20 sickness absence and disability pension. This leads to an increased focus on the rehabilitation  
46  
47 21 process for the more vulnerable persons who have a history of work related problems with episodes  
48  
49 22 outside the working market. In addition, special attention should be on the impact complications  
50  
51 23 and stage of disease has on the work ability in order to reduce the risk for sickness absence and  
52  
53 24 retirement years after operation.  
54  
55  
56  
57  
58  
59  
60

1  
2  
3  
4  
5  
6  
7  
8  
9  
10  
11  
12  
13  
14  
15  
16  
17  
18  
19  
20  
21  
22  
23  
24  
25  
26  
27  
28  
29  
30  
31  
32  
33  
34  
35  
36  
37  
38  
39  
40  
41  
42  
43  
44  
45  
46  
47  
48  
49  
50  
51  
52  
53  
54  
55  
56  
57  
58  
59  
60

1

## 2 **Acknowledgment**

3 This work is funded by The Danish Cancer Society and The Novo Nordisk Foundation and is part  
4 of The Centre for Integrated Rehabilitation of Cancer Patients (CIRE).

5

6 **Ethics approval:** The study based solely on national and administrative registers and did not  
7 require any approval from the ethics committee according to national regulations.

8

## 9 **Author contribution:**

10 Study conception and design: All authors

11 Acquisition of data: Merete Osler and Kathrine Carlsen

12 Analysis of data: Kathrine Carlsen

13 Interpretation of data: All authors

14 Writing manuscript: All authors

15

## 16 **Funding**

17 Funded by The Danish Cancer Society and The Novo Nordisk Foundation.

18

## 19 **Competing Interests**

20 None

21

## 22 **Data Sharing**

23 No additional data



1  
2  
3  
4 1 Figure Legends : Figure 1: Transition states between labor market outcomes in Denmark. Work,  
5 2 sickness absence and unemployment covers persons in the workforce while retirement independent  
6 3 of reason (disability or age) are an irreversible state, where persons are considered to leave the  
7 4 workforce forever.  
8 5 Figure 2: Flowchart showing the selection of persons from the total database to the final study  
9 6 population\*.  
10 7  
11 8  
12  
13  
14  
15  
16  
17  
18  
19  
20  
21  
22  
23  
24  
25  
26  
27  
28  
29  
30  
31  
32  
33  
34  
35  
36  
37  
38  
39  
40  
41  
42  
43  
44  
45  
46  
47  
48  
49  
50  
51  
52  
53  
54  
55  
56  
57  
58  
59  
60

1  
2  
3  
4  
5  
6  
7  
8  
9  
10  
11  
12  
13  
14  
15  
16  
17  
18  
19  
20  
21  
22  
23  
24  
25  
26  
27  
28  
29  
30  
31  
32  
33  
34  
35  
36  
37  
38  
39  
40  
41  
42  
43  
44  
45  
46  
47  
48  
49  
50  
51  
52  
53  
54  
55  
56  
57  
58  
59  
60

1 Table 1: Characteristics of the colorectal cancer patients diagnosed in Denmark while in their working age and part of  
2 the work force, 2001-2009 (N=6032). Divided into those who were excluded during the first year due to retirement or  
3 death (N=1689) and the included persons (N=4343).

|                                                  | Excluded during the first year N (%) | Included after the first year N (%) | P      |
|--------------------------------------------------|--------------------------------------|-------------------------------------|--------|
| <b>Education</b>                                 |                                      |                                     | <.0001 |
| Primary school                                   | 584 (35)                             | 1244 (29)                           |        |
| Vocational and short education                   | 781 (46)                             | 2037 (47)                           |        |
| Medium and long education                        | 324 (19)                             | 1062 (24)                           |        |
| Unknown                                          | 0 (0)                                | 0 (0)                               |        |
| <b>Disposal income (DKr.)</b>                    |                                      |                                     | <.0001 |
| Mean                                             | 192 206                              | 210 807                             |        |
| <b>Job type</b>                                  |                                      |                                     | <.0001 |
| Management and knowledge work                    | 190 (11)                             | 740 (17)                            |        |
| Office and sale (non-manual)                     | 401 (24)                             | 1414 (33)                           |        |
| Manual                                           | 893 (53)                             | 1661 (38)                           |        |
| Other                                            | 205 (12)                             | 528 (12)                            |        |
| <b>Gender</b>                                    |                                      |                                     | 0.03   |
| Women                                            | 691 (41)                             | 1913 (44)                           |        |
| Men                                              | 998 (59)                             | 2430 (56)                           |        |
| <b>Age</b>                                       |                                      |                                     | <.0001 |
| Mean                                             | 56.6                                 | 53.8                                |        |
| <b>Country of birth</b>                          |                                      |                                     | 0.02   |
| Denmark                                          | 1637 (97)                            | 4150 (96)                           |        |
| Other                                            | 52 (3)                               | 193 (4)                             |        |
| <b>Marital status</b>                            |                                      |                                     | <.0001 |
| Married / cohabiting                             | 1042 (62)                            | 3162 (73)                           |        |
| Single                                           | 494 (29)                             | 1154 (26)                           |        |
| Unknown                                          | 153 (9)                              | 27 (1)                              |        |
| <b>Year of operation</b>                         |                                      |                                     | 0.55   |
| 2001                                             | 104 (6)                              | 309 (7)                             |        |
| 2002                                             | 178 (10)                             | 458 (10)                            |        |
| 2003                                             | 176 (10)                             | 439 (10)                            |        |
| 2004                                             | 213 (13)                             | 494 (11)                            |        |
| 2005                                             | 210 (12)                             | 486 (11)                            |        |
| 2006                                             | 199 (12)                             | 568 (13)                            |        |
| 2007                                             | 211 (12)                             | 545 (13)                            |        |
| 2008                                             | 197 (12)                             | 530 (12)                            |        |
| 2009                                             | 201 (12)                             | 514 (12)                            |        |
| <b>Type of cancer</b>                            |                                      |                                     | <.0001 |
| Colonic                                          | 1063 (63)                            | 2464 (57)                           |        |
| Rectal                                           | 626 (37)                             | 1879 (43)                           |        |
| <b>Stage</b>                                     |                                      |                                     | <.0001 |
| I                                                | 306 (18)                             | 1535 (35)                           |        |
| II                                               | 43 (3)                               | 146 (3)                             |        |
| III                                              | 351 (21)                             | 1411 (32)                           |        |
| IV                                               | 858 (51)                             | 760 (18)                            |        |
| Unknown                                          | 131 (8)                              | 491 (11)                            |        |
| <b>Comorbidity</b>                               |                                      |                                     | <.0001 |
| No                                               | 1447 (86)                            | 4018 (93)                           |        |
| Yes                                              | 224 (14)                             | 325 (7)                             |        |
| <b>ASA</b>                                       |                                      |                                     | <.0001 |
| I                                                | 484 (29)                             | 2168 (50)                           |        |
| II                                               | 771 (46)                             | 1731 (40)                           |        |
| ->III                                            | 240 (14)                             | 172 (4)                             |        |
| Unknown                                          | 194 (11)                             | 272 (6)                             |        |
| <b>Curative operation</b>                        |                                      |                                     | <.0001 |
| Yes                                              | 677 (40)                             | 3278 (75)                           |        |
| No                                               | 884 (52)                             | 867 (20)                            |        |
| Unknown                                          | 128 (8)                              | 198 (5)                             |        |
| <b>Type of operation</b>                         |                                      |                                     | <.0001 |
| Rectal resection                                 | 228 (14)                             | 206 (5)                             |        |
| Colonic resection                                | 306 (18)                             | 1352 (31)                           |        |
| Explorative laparotomy or formation of an ostomy |                                      |                                     |        |
| Local procedures                                 | 537 (32)                             | 1445 (33)                           |        |
| Unknown                                          | 367 (22)                             | 1197 (28)                           |        |
|                                                  | 251 (15)                             | 143 (3)                             |        |
| <b>Post-operative complications</b>              |                                      |                                     | 0.44   |
| No                                               | 1448 (86)                            | 3689 (85)                           |        |
| Yes                                              | 241 (14)                             | 654 (15)                            |        |

1 Table 2  
 2 Mean number of weeks from one state of employment to the next among 4343 patients aged 18-63  
 3 years diagnosed with colorectal cancer in the years 2001 to 2009 and part of the workforce at time  
 4 of follow-up.

| Mean time in weeks from one year after operation and first change in employment state (% of population) | To work  | To sickness absence | To unemployment | To retirement | To censoring due to age, dead, migration or end of follow-up |
|---------------------------------------------------------------------------------------------------------|----------|---------------------|-----------------|---------------|--------------------------------------------------------------|
| From work (N=2679 / 62%)                                                                                | --       | 57 (31%)            | 63 (10%)        | 75 (1%)       | 136 (58%)                                                    |
| From sickness absence (N=1406 / 32%)                                                                    | 16 (34%) | --                  | 29 (9%)         | 30 (28%)      | 36 (30%)                                                     |
| From unemployment (N=258/ 6%)                                                                           | 22 (47%) | 28 (17%)            | --              | 63 (13%)      | 77 (23%)                                                     |

5  
6

Table 3: HR (95% CI) for return to Work after sickness absence in relation to socioeconomic and clinical factors among 4343 patients aged 18-63 diagnosed with colorectal cancer in the years 2001 to 2009, and part of the work force at time of follow-up.

| SICKNESS ABSENCE → WORK                          | HR – unadjusted (events: 2125) | HR - adjusted for SES§ | HR - adjusted for SES§ and confounders* | HR - adjusted for SES§, confounders and clinical variables |
|--------------------------------------------------|--------------------------------|------------------------|-----------------------------------------|------------------------------------------------------------|
| <b>Education</b>                                 |                                |                        |                                         |                                                            |
| Primary school                                   | 1                              | 1                      | 1                                       | 1                                                          |
| Vocational and short education                   | 0.87 (0.76-0.98)               | 0.91 (0.79-1.05)       | 0.91 (0.78-1.04)                        | 0.92 (0.79-1.06)                                           |
| Medium and long education                        | 1.01 (0.91-1.13)               | 1.09 (0.96-1.24)       | 1.08 (0.95-1.23)                        | 1.06 (0.93-1.21)                                           |
| <b>Disposal income #</b>                         |                                |                        |                                         |                                                            |
| Lowest quartile                                  | 1                              | 1                      | 1                                       | 1                                                          |
| Second lowest quartile                           | 1.11 (0.97-1.26)               | 1.03 (0.90-1.17)       | 1.01 (0.88-1.15)                        | 1.07 (0.94-1.22)                                           |
| Second highest quartile                          | 1.27 (1.12-1.44)□              | 1.14 (1.00-1.29)       | 1.12 (0.98-1.27)                        | 1.15 (1.00-1.31)                                           |
| Highest quartile                                 | 1.25 (1.10-1.42)□              | 1.15 (1.00-1.33)       | 1.14 (0.99-1.32)                        | 1.16 (1.00-1.34)                                           |
| <b>Job type</b>                                  |                                |                        |                                         |                                                            |
| Management and knowledge work                    | 1.18 (0.95-1.22)               | 1.10 (0.90-1.28)       | 1.10 (0.94-1.28)                        | 1.11 (0.95-1.30)                                           |
| Office and sale (non-manual)                     | 1.07 (0.97-1.17)               | 1.07 (0.97-1.19)       | 1.09 (0.98-1.22)                        | 1.10 (0.99-1.23)                                           |
| Manual                                           | 1                              | 1                      | 1                                       | 1                                                          |
| Other                                            | 0.71 (0.58-0.87)               | 0.71 (0.57-0.86)□      | 1.17 (0.50-2.29)                        | 0.88 (0.37-1.73)                                           |
| <b>Previous periods of work</b>                  |                                |                        |                                         |                                                            |
|                                                  | 1.01 (1.01-1.02)□              | 1.13 (1.11-1.16)□□     | 1.13 (1.11-1.16)□□                      | 1.13 (1.11-1.16)□□                                         |
| <b>Previous periods of sickness absence</b>      |                                |                        |                                         |                                                            |
|                                                  | 1.05 (1.04-1.05)□□             | 0.94 (0.92-0.96)□□     | 0.94 (0.92-0.96)□□                      | 0.93 (0.91-0.95)□□                                         |
| <b>Previous periods of unemployment</b>          |                                |                        |                                         |                                                            |
|                                                  | 0.98 (0.98-0.99)□              | 0.89 (0.87-0.91)□□     | 0.89 (0.87-0.91)□□                      | 0.88 (0.87-0.90)□□                                         |
| <b>Type of cancer</b>                            |                                |                        |                                         |                                                            |
| Colonic                                          | 1                              |                        |                                         | 1                                                          |
| Rectal                                           | 1.01 (0.93-1.10)               |                        |                                         | 0.96 (0.84-1.08)                                           |
| <b>Stage</b>                                     |                                |                        |                                         |                                                            |
| I                                                | 1                              |                        |                                         | 1                                                          |
| II                                               | 0.73 (0.56-0.94)□              |                        |                                         | 0.82 (0.62-1.06)                                           |
| III                                              | 0.76 (0.69-0.84)□□             |                        |                                         | 0.74 (0.66-0.82)□□                                         |
| IV                                               | 0.36 (0.31-0.41)□□             |                        |                                         | 0.53 (0.41-0.68)□□                                         |
| Unknown                                          | 1.14 (1.00-1.30)               |                        |                                         | 1.15 (0.96-1.39)                                           |
| <b>Comorbidity</b>                               |                                |                        |                                         |                                                            |
| No                                               | 1                              |                        |                                         | 1                                                          |
| Yes                                              | 0.81 (0.73-0.89)□              |                        |                                         | 0.90 (0.82-1.00)                                           |
| <b>ASA</b>                                       |                                |                        |                                         |                                                            |
| I                                                | 1                              |                        |                                         | 1                                                          |
| II                                               | 0.84 (0.77-0.92)□              |                        |                                         | 0.93 (0.85-1.03)                                           |
| >III                                             | 0.67 (0.52-0.84)□              |                        |                                         | 0.85 (0.65-1.07)                                           |
| Unknown                                          | 0.89 (0.73-1.06)               |                        |                                         | 1.07 (0.79-1.41)                                           |
| <b>Curative I operation</b>                      |                                |                        |                                         |                                                            |
| Yes                                              | 1                              |                        |                                         | 1                                                          |
| No                                               | 0.43 (0.38-0.49)□□             |                        |                                         | 0.69 (0.55-0.86)□                                          |
| Unknown                                          | 0.83 (0.68-1.02)               |                        |                                         | 0.90 (0.62-1.26)                                           |
| <b>Type of operation</b>                         |                                |                        |                                         |                                                            |
| Rectal resection                                 | 1                              |                        |                                         | 1                                                          |
| Colonic resection                                | 0.95 (0.85-1.05)               |                        |                                         | 0.95 (0.83-1.09)                                           |
| Explorative laparotomy or formation of an ostomy | 0.99 (0.89-1.10)               |                        |                                         | 1.06 (0.91-1.23)                                           |
| Local procedures                                 | 0.65 (0.50-0.83)□              |                        |                                         | 0.76 (0.57-1.00)□                                          |
| Unknown                                          | 0.33 (0.22-0.48)□□             |                        |                                         | 0.48 (0.30-0.75)□                                          |
| <b>Post-operative complications</b>              |                                |                        |                                         |                                                            |
| No                                               | 1                              |                        |                                         | 1                                                          |
| Yes                                              | 0.84 (0.74-0.94)□              |                        |                                         | 0.82 (0.72-0.92)□                                          |

\*Confounders: Gender, age at time of diagnosis, country of birth, marital status and year of operation

§ SES (Socioeconomic status): education, disposal income and job type

□ Significant at a 0.05 level

□□ Significant at a <.0001 level

# Depending on year the highest disposal income ranged from 175.500 DKr in 2001 to 299.717 DKr in 2009

1  
2  
3  
4  
5  
6  
7  
8  
9  
10  
11  
12  
13  
14  
15  
16  
17  
18  
19  
20  
21  
22  
23  
24  
25  
26  
27  
28  
29  
30  
31  
32  
33  
34  
35  
36  
37  
38  
39  
40  
41  
42  
43  
44  
45  
46  
47  
48  
49  
50  
51  
52  
53  
54  
55  
56  
57  
58  
59  
60

1  
2

Table 4: HR (95% CI) for sickness absence after an episode of work in relation to socioeconomic and clinical factors among 4343 patients aged 18-63 diagnosed with colorectal cancer in the years 2001 to 2009, and part of the work force at time of follow-up.

| WORK → SICKNESS ABSENCE                          | HR - unadjusted<br>(events: 2296) | HR - adjusted for SES§ | HR - adjusted for SES§<br>and confounders* | HR - adjusted for SES§,<br>confounders* and<br>clinical variables |
|--------------------------------------------------|-----------------------------------|------------------------|--------------------------------------------|-------------------------------------------------------------------|
| <b>Education</b>                                 |                                   |                        |                                            |                                                                   |
| Primary school                                   | 1                                 | 1                      | 1                                          | 1                                                                 |
| Vocational and short education                   | 1.25 (1.11-1.41)□                 | 1.10 (0.96-1.27)       | 1.10 (0.96-1.27)                           | 1.07 (0.93-1.23)                                                  |
| Medium and long education                        | 1.40 (1.26-1.56)□□                | 1.22 (1.08-1.38)□      | 1.21 (1.07-1.37)□                          | 1.18 (1.04-1.34)□                                                 |
| <b>Disposal income #</b>                         |                                   |                        |                                            |                                                                   |
| Lowest quartile                                  | 1                                 | 1                      | 1                                          | 1                                                                 |
| Second lowest quartile                           | 1.18 (1.04-1.33)                  | 1.18 (1.05-1.34)□      | 1.17 (1.03-1.33)                           | 1.13 (0.99-1.28)                                                  |
| Second highest quartile                          | 1.02 (0.91-1.16)                  | 1.04 (0.92-1.18)       | 1.02 (0.90-1.16)                           | 1.00 (0.88-1.14)                                                  |
| Highest quartile                                 | 0.82 (0.73-0.94)□                 | 0.99 (0.87-1.14)       | 0.99 (0.86-1.14)                           | 0.96 (0.84-1.11)                                                  |
| <b>Job type</b>                                  |                                   |                        |                                            |                                                                   |
| Management and knowledge work                    | 0.69 (0.61-0.78)□□                | 0.96 (0.83-1.12)       | 0.97 (0.84-1.14)                           | 0.95 (0.82-1.11)                                                  |
| Office and sale (non-manual)                     | 0.89 (0.82-0.98)                  | 1.00 (0.91-1.10)       | 1.00 (0.91-1.12)                           | 1.00 (0.90-1.11)                                                  |
| Manual                                           | 1                                 | 1                      | 1                                          | 1                                                                 |
| Other                                            | 0.67 (0.54-0.83)□                 | 0.84 (0.67-1.04)       | 1.00 (0.48-1.82)                           | 1.06 (0.51-1.93)                                                  |
| <b>Previous episodes of work</b>                 | 1.03 (1.03-1.03)□□                | 1.02 (1.01-1.04)□      | 1.02 (1.01-1.04)□                          | 1.03 (1.01-1.04)□                                                 |
| <b>Previous episodes of sickness absence</b>     | 1.10 (1.09-1.11)□□                | 1.08 (1.06-1.09)□□     | 1.08 (1.06-1.09)□□                         | 1.08 (1.06-1.09)□□                                                |
| <b>Previous episodes of unemployment</b>         | 1.01 (1.01-1.02)□                 | 0.98 (0.97-0.99)□      | 0.98 (0.97-0.99)□                          | 0.98 (0.97-0.99)□                                                 |
| <b>Type of cancer</b>                            |                                   |                        |                                            |                                                                   |
| Colonic                                          | 1                                 |                        |                                            | 1                                                                 |
| Rectal                                           | 1.10 (1.01-1.19)                  |                        |                                            | 1.17 (1.03-1.32)□                                                 |
| <b>Stage</b>                                     |                                   |                        |                                            |                                                                   |
| I                                                | 1                                 |                        |                                            | 1                                                                 |
| II                                               | 0.97(0.74-1.25)                   |                        |                                            | 0.99(0.75-1.28)                                                   |
| III                                              | 1.29 (1.16-1.41)□                 |                        |                                            | 1.24 (1.11-1.37)□                                                 |
| IV                                               | 1.63 (1.40-1.88)□□                |                        |                                            | 1.52 (1.21-1.91)□                                                 |
| Unknown                                          | 1.11 (0.98-1.25)                  |                        |                                            | 1.08 (0.91-1.29)                                                  |
| <b>Co-morbidity</b>                              |                                   |                        |                                            |                                                                   |
| No                                               | 1                                 |                        |                                            | 1                                                                 |
| Yes                                              | 0.99 (0.90-1.08)                  |                        |                                            | 1.05 (0.96-1.16)                                                  |
| <b>ASA</b>                                       |                                   |                        |                                            |                                                                   |
| I                                                | 1                                 |                        |                                            | 1                                                                 |
| II                                               | 1.09 (1.00-1.19)                  |                        |                                            | 1.09 (0.99-1.20)                                                  |
| ->III                                            | 1.42 (1.12-1.75)□                 |                        |                                            | 1.33 (1.05-1.67)□                                                 |
| Unknown                                          | 1.02 (0.85-1.21)                  |                        |                                            | 0.92 (0.70-1.19)                                                  |
| <b>Curative operation</b>                        |                                   |                        |                                            |                                                                   |
| Yes                                              | 1                                 |                        |                                            | 1                                                                 |
| No                                               | 1.43 (1.26-1.61)□□                |                        |                                            | 1.35 (1.11-1.63)□                                                 |
| Unknown                                          | 1.05 (0.87-1.29)                  |                        |                                            | 1.07 (0.77-1.45)                                                  |
| <b>Type of operation</b>                         |                                   |                        |                                            |                                                                   |
| Rectal resection                                 | 1                                 |                        |                                            | 1                                                                 |
| Colonic resection                                | 1.0 (0.91-1.11)                   |                        |                                            | 1.10 (0.97-1.25)                                                  |
| Explorative laparotomy or formation of an ostomy | 0.91 (0.82-1.01)                  |                        |                                            | 1.05 (0.91-1.22)                                                  |
| Local procedures                                 | 0.72 (0.56-0.91)□                 |                        |                                            | 0.78 (0.60-1.01)                                                  |
| Unknown                                          | 0.93 (0.66-1.26)                  |                        |                                            | 0.81 (0.53-1.20)                                                  |
| <b>Post-operative complications</b>              |                                   |                        |                                            |                                                                   |
| No                                               | 1                                 |                        |                                            | 1                                                                 |
| Yes                                              | 1.18 (1.05-1.31)□                 |                        |                                            | 1.25 (1.11-1.41)□                                                 |

\*Confounders: Gender, age at time of diagnosis, country of birth, marital status and year of operation

§ SES (Socioeconomic status): education, disposal income and job type

□ Significant at a 0.05 level

□□ Significant at a <.0001 level

# Depending on year the highest disposal income ranged from 175.500 DKr in 2001 to 299.717 DKr in 2009

1  
2  
3  
4  
5  
6  
7  
8  
9  
10  
11  
12  
13  
14  
15  
16  
17  
18  
19  
20  
21  
22  
23  
24  
25  
26  
27  
28  
29  
30  
31  
32  
33  
34  
35  
36  
37  
38  
39  
40  
41  
42  
43  
44  
45  
46  
47  
48  
49  
50  
51  
52  
53  
54  
55  
56  
57  
58  
59  
60

1  
2

Table 5: HR (95% CI) for retirement in relation to socioeconomic and clinical factors among 4343 patients aged 18-63 diagnosed with colorectal cancer in the years 2001 to 2009, and part of the work force at time of follow-up.

| Mutually adjusted and controlled for confounders* | HR for transition from sickness absence -> retirement (number of events:569) | HR for transition from work / unemployed -> retirement (number of events: 109) |
|---------------------------------------------------|------------------------------------------------------------------------------|--------------------------------------------------------------------------------|
| <b>Status</b>                                     |                                                                              |                                                                                |
| Working                                           | ---                                                                          | 1                                                                              |
| Unemployed                                        |                                                                              | 5.89 (3.46-10.03)□□                                                            |
| <b>Education</b>                                  |                                                                              |                                                                                |
| Primary school                                    | 1                                                                            | 1                                                                              |
| Vocational and short education                    | 1.13 (0.85-1.51)                                                             | 1.29 (0.65-2.69)                                                               |
| Medium and long education                         | 1.06 (0.81-1.41)                                                             | 1.24 (0.64-2.53)                                                               |
| <b>Disposal income #</b>                          |                                                                              |                                                                                |
| Lowest quartile                                   | 1                                                                            | 1                                                                              |
| Second lowest quartile                            | 0.95 (0.76-1.19)                                                             | 0.49 (0.27-0.85)□                                                              |
| Second highest quartile                           | 0.77 (0.60-0.98)□                                                            | 0.47 (0.25-0.83)□                                                              |
| Highest quartile                                  | 0.79 (0.60-1.04)                                                             | 0.29 (0.14-0.57)□                                                              |
| <b>Job type</b>                                   |                                                                              |                                                                                |
| Management and knowledge work                     | 0.59 (0.42-0.82)□                                                            | 0.93 (0.85-1.03)                                                               |
| Office and sale (non-manual)                      | 0.72 (0.580.89)□                                                             | 0.96 (0.86-1.06)                                                               |
| Manual                                            | 1                                                                            | 1                                                                              |
| Other                                             | 1.05 (0.06-4.85)                                                             | 0.38 (0.12-1.37)                                                               |
| <b>Previous episodes of work</b>                  | 0.98 (0.95-1.00)                                                             | 0.93 (0.85-1.03)                                                               |
| <b>Previous episodes of sickness absence</b>      | 1.00 (0.97-1.02)                                                             | 0.96 (0.86-1.06)                                                               |
| <b>Previous episodes of unemployment</b>          | 1.03 (1.00-1.05)□                                                            | 1.02 (0.94-1.11)                                                               |
| <b>Type of cancer</b>                             |                                                                              |                                                                                |
| Colonic                                           | 1                                                                            | 1                                                                              |
| Rectal                                            | 1.32 (1.04-1.67)□                                                            | 1.33 (0.75-2.34)                                                               |
| <b>Stage</b>                                      |                                                                              |                                                                                |
| I                                                 | 1                                                                            | 1                                                                              |
| II                                                | 0.85 (0.46-1.46)                                                             | 1.70 (0.49-4.51)                                                               |
| III                                               | 1.13 (0.89-1.44)                                                             | 1.91 (1.15-3.21)□                                                              |
| IV                                                | 1.58 (1.04-2.42)□                                                            | 2.30 (0.88-6.14)                                                               |
| Unknown                                           | 1.01 (0.68-1.50)                                                             | 1.72 (0.82-3.59)                                                               |
| <b>Comorbidity</b>                                |                                                                              |                                                                                |
| No                                                | 1                                                                            | 1                                                                              |
| Yes                                               | 1.03 (0.85-1.24)                                                             | 1.17 (0.76-1.77)                                                               |
| <b>ASA</b>                                        |                                                                              |                                                                                |
| I                                                 | 1                                                                            | 1                                                                              |
| II                                                | 1.31 (1.08-1.58)□                                                            | 1.56 (1.00-2.44)□                                                              |
| III                                               | 2.16 (1.49-3.06)□                                                            | 2.57 (1.03-5.75)□                                                              |
| Unknown                                           | 1.29 (0.76-2.09)                                                             | 1.64 (0.50-4.24)                                                               |
| <b>Curative operation</b>                         |                                                                              |                                                                                |
| Yes                                               | 1                                                                            | 1                                                                              |
| No                                                | 1.30 (0.89-1.86)                                                             | 1.80 (0.77-3.84)                                                               |
| Unknown                                           | 1.41 (0.75-2.51)                                                             | 1.05 (0.19-4.01)                                                               |
| <b>Type of operation</b>                          |                                                                              |                                                                                |
| Rectal resection                                  | 1                                                                            | 1                                                                              |
| Colonic resection                                 | 1.42 (1.11-1.81)□                                                            | 1.36 (0.74-2.51)                                                               |
| Explorative laparotomy or formation of an ostomy  | 1.06 (0.78-1.43)                                                             | 1.23 (0.55-2.32)                                                               |
| Local procedures                                  | 1.01 (0.53-1.84)                                                             | 0.39 (0.08-1.26)                                                               |
| Unknown                                           | 1.45 (0.93-2.18)                                                             | 0.84 (0.16-3.13)                                                               |
| <b>Post-operative complications</b>               |                                                                              |                                                                                |
| No                                                | 1                                                                            | 1                                                                              |
| Yes                                               | 1.23 (1.00-1.51)□                                                            | 0.86 (0.47-1.46)                                                               |

\*Confounders: Gender, age at time of diagnosis, country of birth, marital status and year of operation

□ Significant at a 0.05 level

□□ Significant at a <.0001 level

# Depending on year the highest disposal income ranged from 175.500 DKr in 2001 to 299.717 DKr in 2009

## Reference List

- 1  
2  
3  
4 1  
5  
6 2  
7 3  
8 4  
9 5  
10  
11  
12 6  
13 7  
14 8  
15 9  
16  
17 10  
18 11  
19 12  
20  
21 13  
22 14  
23  
24 15  
25 16  
26  
27  
28 17  
29 18  
30 19  
31  
32 20  
33 21  
34 22  
35  
36 23  
37 24  
38 25  
39  
40 26  
41 27  
42 28  
43  
44 29  
45 30  
46  
47  
48 31  
49 32  
50  
51 33  
52 34  
53 35  
54  
55 36  
56 37  
57  
58  
59  
60
- (1) Ferlay J, Parkin DM, Steliarova-Foucher E. Estimates of cancer incidence and mortality in Europe in 2008. *Eur J Cancer* 2010; 46(4):765-781.
- (2) Coleman MP, Forman D, Bryant H, et al. Cancer survival in Australia, Canada, Denmark, Norway, Sweden, and the UK, 1995-2007 (the International Cancer Benchmarking Partnership): an analysis of population-based cancer registry data. *Lancet* 2011; 377(9760):127-138.
- (3) Brenner H, Bouvier AM, Foschi R, et al. Progress in colorectal cancer survival in Europe from the late 1980s to the early 21st century: the EURO CARE study. *Int J Cancer* 2012; 131(7):1649-1658.
- (4) Gordon L, Lynch BM, Newman B. Transitions in work participation after a diagnosis of colorectal cancer. *Aust N Z J Public Health* 2008; 32(6):569-574.
- (5) van den Brink M, van den Hout WB, Kievit J, et al. The impact of diagnosis and treatment of rectal cancer on paid and unpaid labor. *Dis Colon Rectum* 2005; 48(10):1875-1882.
- (6) Frederiksen BL, Osler M, Harling H, et al. The impact of socioeconomic factors on 30-day mortality following elective colorectal cancer surgery: a nationwide study. *Eur J Cancer* 2009; 45(7):1248-1256.
- (7) Cavalli-Bjorkman N, Lambe M, Eaker S, et al. Differences according to educational level in the management and survival of colorectal cancer in Sweden. *Eur J Cancer* 2011; 47(9):1398-1406.
- (8) Egeberg R, Halkjaer J, Rottmann N, et al. Social inequality and incidence of and survival from cancers of the colon and rectum in a population-based study in Denmark, 1994-2003. *Eur J Cancer* 2008; 44(14):1978-1988.
- (9) Aarts MJ, Lemmens VEPP, Louwman MWJ, et al. Socioeconomic status and changing inequalities in colorectal cancer? A review of the associations with risk, treatment and outcome. *European Journal of Cancer* 2010; 46(15):2681-2695.
- (10) Drolet M, Maunsell E, Brisson J, et al. Not Working 3 Years After Breast Cancer: Predictors in a Population-Based Study. *J Clin Oncol* 2005; 23(33):8305-8312.
- (11) Steiner JF, Cavender TA, Nowels CT, et al. The impact of physical and psychosocial factors on work characteristics after cancer. *Psychooncology* 2008; 17(2):138-147.
- (12) Paraponaris A, Teyssier LS, Ventelou B. Job tenure and self-reported workplace discrimination for cancer survivors 2 years after diagnosis: does employment legislation matter? *Health Policy* 2010; 98(2-3):144-155.
- (13) Earle CC, Chretien Y, Morris C, et al. Employment among survivors of lung cancer and colorectal cancer. *J Clin Oncol* 2010; 28(10):1700-1705.

1  
2  
3  
4  
5  
6  
7  
8  
9  
10  
11  
12  
13  
14  
15  
16  
17  
18  
19  
20  
21  
22  
23  
24  
25  
26  
27  
28  
29  
30  
31  
32  
33  
34  
35  
36  
37  
38  
39  
40  
41  
42  
43  
44  
45  
46  
47  
48  
49  
50  
51  
52  
53  
54  
55  
56  
57  
58  
59  
60

- (14) Spelten ER, Sprangers MA, Verbeek JH. Factors reported to influence the return to work of cancer survivors: a literature review. *Psychooncology* 2002; 11(2):124-131.
- (15) Short PF, Vasey JJ, Tunceli K. Employment pathways in a large cohort of adult cancer survivors. *Cancer* 2005; 103(6):1292-1301.
- (16) Mehnert A. Employment and work-related issues in cancer survivors. *Crit Rev Oncol Hematol* 2011; 77(2):109-130.
- (17) Dalton SO, Steding-Jessen M, Gislum M, et al. Social inequality and incidence of and survival from cancer in a population-based study in Denmark, 1994-2003: Background, aims, material and methods. *Eur J Cancer* 2008; 44(14):1938-1949.
- (18) Amir Z, Moran T, Walsh L, et al. Return to paid work after cancer: a British experience. *J Cancer Surviv* 2007; 1(2):129-136.
- (19) Carlsen K, Dalton SO, Frederiksen K, et al. Cancer and the risk for taking early retirement pension: A Danish cohort study. *Scandinavian Journal of Public Health* 2008; 36(2):117-125.
- (20) Sjøvall K, Attner B, Englund M, et al. Sickness absence among cancer patients in the pre-diagnostic and the post-diagnostic phases of five common forms of cancer. *Support Care Cancer* 2012; 20(4):741-747.
- (21) Syse A, Tretli S, Kravdal O. Cancer's impact on employment and earnings--a population-based study from Norway. *J Cancer Surviv* 2008; 2(3):149-158.
- (22) Mols F, Thong MS, Vissers P, et al. Socio-economic implications of cancer survivorship: results from the PROFILES registry. *Eur J Cancer* 2012; 48(13):2037-2042.
- (23) Andersen PK, Keiding N. Multi-state models for event history analysis. *Stat Methods Med Res* 2002; 11(2):91-115.
- (24) Christensen KB, Andersen PK, Smith-Hansen L, et al. Analyzing sickness absence with statistical models for survival data. *Scand J Work Environ Health* 2007; 33(3):233-239.
- (25) Gjesdal S, Ringdal PR, Haug K, et al. Long-term sickness absence and disability pension with psychiatric diagnoses: a population-based cohort study. *Nord J Psychiatry* 2008; 62(4):294-301.
- (26) Lie SA, Eriksen HR, Ursin H, et al. A multi-state model for sick-leave data applied to a randomized control trial study of low back pain. *Scand J Public Health* 2008; 36(3):279-283.
- (27) Pedersen J, Bjorner JB, Burr H, et al. Transitions between sickness absence, work, unemployment, and disability in Denmark 2004-2008. *Scand J Work Environ Health* 2012; 38(6):516-526.
- (28) Oyeflaten I, Lie SA, Ihlebaek CM, Eriksen HR et al. Multiple transitions in sick leave, disability benefits, and return to work. - A 4-year follow-up of patients participating in a



- 1  
2  
3  
4 1 work-related rehabilitation program. *BMC Public Health* 2012; 12:748.  
5  
6 2 (29) Frederiksen BL, Osler M, Harling H, et al. Do patient characteristics, disease, or treatment  
7 3 explain social inequality in survival from colorectal cancer? *Soc Sci Med* 2009; 69(7):1107-  
8 4 1115.  
9  
10 5 (30) IDA - an integrated data base for labour market research. Main report, 1991 . 2006.  
11 6 Statistics Denmark. Ref Type: Report  
12 7  
13 8 (31) Lyng E, Sandegaard JL, Rebolj M. The Danish National Patient Register. *Scand J Public*  
14 9 *Health* 2011; 39(7 Suppl):30-33.  
15  
16  
17 10 (32) Kildemoes HW, Sorensen HT, Hallas J. The Danish National Prescription Registry. *Scand J*  
18 11 *Public Health* 2011; 39(7 Suppl):38-41.  
19  
20 12 (33) Hjollund NH, Larsen FB, Andersen JH. Register-based follow-up of social benefits and  
21 13 other transfer payments: accuracy and degree of completeness in a Danish interdepartmental  
22 14 administrative database compared with a population-based survey. *Scand J Public Health*  
23 15 2007; 35(5):497-502.  
24  
25 16 (34) Sanchez KM, Richardson JL, Mason HR. The return to work experiences of colorectal  
26 17 cancer survivors. *AAOHN J* 2004; 52(12):500-510.  
27  
28 18 (35) Taskila T, Martikainen R, Hietanen P, et al. Comparative study of work ability between  
29 19 cancer survivors and their referents. *Eur J Cancer* 2007; 43(5):914-920.  
30  
31 20 (36) Mols F, Thong MS, Vreugdenhil G, et al Long-term cancer survivors experience work  
32 21 changes after diagnosis: results of a population-based study. *Psychooncology* 2009;  
33 22 18(12):1252-1260.  
34  
35 23 (37) Rodriguez-Bigas MA, Chang GJ, Skibber JM. Barriers to rehabilitation of colorectal cancer  
36 24 patients. *J Surg Oncol* 2007; 95(5):400-408.  
37 25  
38 26  
39  
40  
41  
42  
43  
44  
45  
46  
47  
48  
49  
50  
51  
52  
53  
54  
55  
56  
57  
58  
59  
60

1  
2  
3  
4 1 The transition between work, sickness absence and pension in a cohort of Danish colorectal cancer  
5  
6 2 survivors.

7 3  
8  
9 4 BY

10 5 Kathrine Carlsen, MSc, MPH, PhD\*<sup>1</sup>

11 6 Henrik Harling, MD, Clinical Doctor<sup>2</sup>

12 7 Jacob Pedersen, MSc, Statistician<sup>3</sup>

13 8 Karl Bang Christensen, Statistician<sup>4</sup>

14 9 Merete Osler, MD, Professor<sup>5</sup>

15 **E-mail addresses and affiliations:**

16 \* Corresponding author; kathrine.carlsen@regionh.dk, phone: +45 38633384, Fax: +45 38633977

17 1: kathrine.carlsen@regionh.dk. Research Centre for Prevention and Health, Glostrup University  
18 Hospital, 2600 Glostrup, Denmark

19 2: hhar0002@bbh.regionh.dk. Department of Surgery, Bispebjerg University Hospital, 2400  
20 Copenhagen, Denmark

21 3: jpe@nrcwe.dk. National Research Centre for the Working Environment, 2100 Copenhagen,  
22 Denmark

23 4: kach@sund.ku.dk. Department of Biostatistics, University of Copenhagen, 1014 Copenhagen K,  
24 Denmark

25 5: merete.osler@regionh.dk. Research Centre for Prevention and Health, Glostrup University  
26 Hospital, 2600 Glostrup, Denmark

27  
28 Number of words: 3291

29 Abstract: 300 words

30 Number of references: 37

31 Number of figures: 2

32 Number of tables: 5

1  
2  
3  
4 **Abstract**

5 Objectives: The aim of this study was to evaluate the impact of socioeconomic and clinical factors  
6  
7  
8 on the transitions between work, sickness absence and retirement in a cohort of Danish colorectal  
9  
10 cancer survivors.

11  
12 Design: Register based cohort study with up to 10 years of follow-up.

13  
14  
15 Setting: Population based study with use of administrative health related and socioeconomic  
16  
17 registers.

18  
19 Participants: All persons (N=4343) diagnosed with colorectal cancer in Denmark in the years 2001-  
20  
21 2009 while they were in their working age (18-63 years) and who were part of the labor force one  
22  
23 year post diagnosis.

24  
25  
26 Primary and secondary outcome measures: By use of multi-state models in Cox proportional  
27  
28 hazards models we analyzed the hazard ratio for re-employment, sickness absence and retirement in  
29  
30 models including clinical as well as health related variables.

31  
32 Results: One year after diagnosis 62% were working and 58% continued until end of follow-up.  
33  
34 Socioeconomic factors were found to be associated with retirement but not with sickness absence  
35  
36 and return to work. The risk for transition from work to sickness absence was increased if the  
37  
38 disease was diagnosed at a later stage (stage III) 1.52 (95% CI: 1.21-1.91), not operated curatively  
39  
40 1.35 (95% CI: 1.11-1.63) and with occurrence of post-operative complications 1.25 (95% CI: 1.11-  
41  
42 1.41). The opposite was found for the transition from sickness absence back to work.

43  
44  
45  
46 Conclusion: This nationwide study of colorectal cancer patients who have survived one year shows  
47  
48 that stage of disease, general health state of the individual, post-operative complications and the  
49  
50 history of sickness absence and unemployment have an impact on the transition between work,  
51  
52 sickness absence and disability pension. **This leads to an increased focus on the rehabilitation**  
53  
54 **process for the more vulnerable persons who have a combination of severe disease and a history of**  
55  
56 **work related problems with episodes outside the working market.**  
57  
58  
59  
60

1  
2  
3  
4  
5  
6  
7  
8  
9  
10  
11  
12  
13  
14  
15  
16  
17  
18  
19  
20  
21  
22  
23  
24  
25  
26  
27  
28  
29  
30  
31  
32  
33  
34  
35  
36  
37  
38  
39  
40  
41  
42  
43  
44  
45  
46  
47  
48  
49  
50  
51  
52  
53  
54  
55  
56  
57  
58  
59  
60

1

**2 Article summary****3 Article focus:**

- 4 • How many colorectal cancer survivors return to work, stay at sickness absence, get unemployed
- 5 or become pensioners in the years following diagnosis?
- 6 • Does socioeconomic position or clinical factors predict re-employment, sickness absence,
- 7 unemployment or pension in this cohort?

**8 Key messages:**

- 9 • First study to differentiate between re-employment, sickness absence, unemployment and
- 10 retirement in a cohort of colorectal cancer survivors.
- 11 • One year after diagnosis 62% had resumed work.
- 12 • Socioeconomic factors were associated with early retirement whereas clinical factors were
- 13 found to be associated with sickness absence and re-employment.

**14 Strengths and limitations:**

- 15 • This is a longitudinal nationwide population based study including more than 4000 persons
- 16 diagnosed with colorectal cancer.
- 17 • The study identifies an association between socioeconomic position / clinical factors and re-
- 18 employment / sickness absence / pension but is not able to identify mechanisms behind.

19

**20 What is new in this paper:**

21 Very few studies have analyzed the impact colorectal cancer has on the affiliation to the labor  
22 market. In this study we are able to identify clinical and socioeconomic risk factors for sickness  
23 absence, work resumption and retirement.

## 1. Introduction

In 2008 nearly 500.000 persons in Europe were diagnosed with colorectal cancer making it the most common cancer and the second most common cause of cancer deaths in Europe<sup>1</sup>. From 1995 to 2007 the survival from colorectal cancer has steadily improved among all age groups<sup>2</sup> and the relative 5-year survival increased in the years 1990 to 2002 from 50% to 60% among persons aged 15 to 59 years<sup>3</sup>.

Throughout Europe life expectancy has increased leading to higher age at pension and longer time in the workforce. As the risk of colorectal cancer increases with age, it can be expected that still more persons will be diagnosed with colorectal cancer while they are an active part of the workforce.

Few studies have analyzed the impact of colorectal cancer on work participation in the years following diagnosis and treatment. The existing studies reported that 2/3 of those working at time of diagnosis resume work in the years after treatment. Risk factors for work cessation were high age; radiation therapy and co-morbidity<sup>4;5</sup>. Several studies<sup>6-9</sup> have shown a negative social gradient in survival of colorectal cancer, but the social consequences has not been studied despite the fact that a negative social gradient in return to work has been observed among cancer survivors in general<sup>10-17</sup>.

Compared to persons diagnosed with testicular-, breast-, endocrine- or skin cancer patients with colorectal cancer had a higher risk of not resuming work and had longer time on sickness absence<sup>13;18-22</sup>.

In order to get a better understanding of the occupational consequences of colorectal cancer it is important to take both socioeconomic and health related factors into account and to differentiate more specifically between the different reasons for not working. In the majority of studies the outcome is 'not returning to work' which is a mix-up of different reasons for not working, i.e.

1  
2  
3  
4  
5  
6  
7  
8  
9  
10  
11  
12  
13  
14  
15  
16  
17  
18  
19  
20  
21  
22  
23  
24  
25  
26  
27  
28  
29  
30  
31  
32  
33  
34  
35  
36  
37  
38  
39  
40  
41  
42  
43  
44  
45  
46  
47  
48  
49  
50  
51  
52  
53  
54  
55  
56  
57  
58  
59  
60

1 unemployment, sickness absence or disability pension and the transition from a cancer diagnosis to  
2 one of these outcomes could very well differ according to different risk factors.

3 These transitions between different states (e.g. from sickness absence to work, or from sickness  
4 absence to disability) can be modeled by using multi-state models<sup>23</sup>. Multi-state models are well-  
5 known statistical models used for event history analysis, e.g. the study of survival. The application  
6 of statistical models for survival analysis in the analysis of sickness absence is relatively new<sup>24;25</sup>  
7 and the use of multi-state models is mainly due to Lie et al<sup>26</sup>, but multi-state models have also been  
8 applied by other researchers<sup>27;28</sup>.

9 By use of detailed, nationwide, population based registers the aim of this study is to evaluate the  
10 impact of both socioeconomic and clinical factors on the transitions between work, sickness  
11 absence and retirement in a cohort of colorectal cancer survivors and to test for interaction between  
12 clinical and socioeconomic factors.

## 13 14 **2. Materials and methods**

15 This study is based on Danish population based registers linked together with the unique personal  
16 identification code given to all Danish residents.

### 17 18 *Danish Colorectal Cancer Group (DCCG)*

19 The study population was derived from the national database of DCCG which includes around 93%  
20 of patients in Denmark with a first-time adenocarcinoma of the rectum (ICD-10: C20) or colon  
21 (ICD-C18). This database comprises prospectively collected data registered by surgeons. The  
22 database has previously been used in epidemiological studies and is described in details elsewhere  
23 <sup>29</sup>. From the database we obtained clinical data with relevance for the probability of returning to  
24 work after treatment. Entry into the study was equal to date of surgery and was used to calculate the

1 follow-up time. Variables describing the disease were cancer type and tumor stage classified  
2 according to the International Union Against Cancer (UICC). Information about surgical procedure  
3 was included as curative operation (yes/no) and type of operation (1=rectal resection, 2=colonic  
4 resection, 3=explorative laparotomy or formation of an ostomy, 4=local procedures). Health status  
5 at time of surgery was measured by ASA score (according to the American Society of  
6 Anesthesiologists) where patients are categorized into five subgroups by preoperative physical  
7 fitness reaching from I - A completely healthy patient to V - A moribund patient who is not expected  
8 to live 24 hours with or without surgery. ASA score III-V was collapsed into one group of patients  
9 with severe systemic diseases. Postoperative complications were grouped as no complications or  
10 one or more complications. The latter group included postoperative bleeding, problems with the  
11 ostomy, intra-abdominal infections or infections in the wound, lack of passage through the intestine,  
12 leak from the intestine or postoperative rupture of the wound.

### 13 *Statistics Denmark*

14 Information on a number of demographic and socioeconomic characteristics was obtained from the  
15 population-based Integrated Database for Labour Market Research (IDA), which has been  
16 administrated by Statistics Denmark since 1980<sup>30</sup>. From IDA we had information about country of  
17 origin (grouped as born in Denmark or born outside Denmark) and marital status (married or  
18 cohabiting, single including widows and unknown). Education was classified according to length of  
19 study (primary school 9-12 years of education, vocational and short education 13-15 years, medium  
20 and long education more than 16 years and unknown). Job type was classified as management and  
21 knowledge work (e.g. leaders, doctors and teachers at high school), office and sale (e.g. secretary,  
22 police and nurses) and manual work (e.g. farmers, craftsmen and social and health care assistants).  
23  
24 In order to obtain information on disposal income for the family we also identified partners and

1  
2  
3  
4  
5  
6  
7  
8  
9  
10  
11  
12  
13  
14  
15  
16  
17  
18  
19  
20  
21  
22  
23  
24  
25  
26  
27  
28  
29  
30  
31  
32  
33  
34  
35  
36  
37  
38  
39  
40  
41  
42  
43  
44  
45  
46  
47  
48  
49  
50  
51  
52  
53  
54  
55  
56  
57  
58  
59  
60

1 their income. Disposal income was calculated as the average of the family income three years  
2 before the year of diagnosis and was deflated according to the 2000 value of the Danish kroner.

3 Education, job type and disposal income were combined under the heading socioeconomic status  
4 (SES).

#### 6 *The Danish National Patient Registry (NPR)*

7 This register holds information on all hospitalizations and outpatient visits in Denmark since 1978.  
8 In this study we used information of date of admission and discharge and diagnosis coded according  
9 to the *International Classifications of Diseases (ICD-10)*<sup>31</sup>.

#### 11 *The Register of Medical Product Statistics (RMPS)*

12 Since 1995 every medical product sold on prescription by Danish pharmacies has been registered.  
13 From this register we had information on date for redemption of the prescription and substance  
14 classified according to the *anatomical-therapeutic-chemical (ATC)* system<sup>32</sup>.

16 Co-morbidity preceding five years before the year of diagnosis was obtained from NPR and RMPS.

17 As comorbidity we included cardiovascular disease, chronic obstructive pulmonary disease,  
18 diabetes and liver, kidney or connective tissue diseases – diseases which are all part of the Charlson  
19 index. Comorbidity was stated if one or more of these diseases were present at time of diagnosis.

#### 21 *Register based Evaluation of Marginalization (DREAM)*

22 The Danish labor market is characterized as a flexicurity system with a high degree of economic  
23 compensation in case of unemployment or reduced work ability (security) but also with a high  
24 turnover rate (flexible). Unemployed persons are warranted economic compensation if they are



1 actively seeking job. During the study period it was possible to receive a maximum of four years of  
2 unemployment benefit. After the end of these four years or if a person is not qualified for  
3 unemployment benefit (i.e. not member of a union) it is possible to receive social income. If a  
4 person is unable to work due to illness or disability it is possible to receive sickness benefit for a  
5 maximum of 52 weeks during a period of two years or apply for early retirement if the work ability  
6 is reduced to a level where it is not possible to hold a job. This holds for all Danish citizens  
7 independent of job type. During the study period the retirement age was 64 years of age.  
8 The outcome of the study was receipt of social transfer payments or in work. Information about  
9 social transfer payments was obtained from the Danish population based administrative register  
10 DREAM. DREAM covers all residents in Denmark who have received social transfer payments  
11 from the state<sup>33</sup> in any given week since 1991. In the present study we included data from DREAM  
12 from week 1 in 2001 until week 13 in 2011. In work was defined as not receiving any social transfer  
13 payments for six consecutive weeks. Transfer income obtained from DREAM was divided into  
14 sickness benefit, unemployment benefit and permanent withdrawal from the workforce due to early  
15 retirement pension or post-employment benefit, which is an optional withdraw from the workforce  
16 not caused by disability.

### 17 18 *Study population*

19 In the years 2001 to 2009 31.570 persons were diagnosed with colorectal cancer in Denmark. The  
20 majority of these persons were diagnosed after the age of retirement and the study population  
21 consists of 4.343 persons aged 18-63 years, who were part of the workforce and survived the first  
22 postoperative year (fig. 2). The follow-up period of this population was between 65 weeks (for  
23 persons diagnosed in the last week of 2009) to 535 week (for persons diagnosed in the first week of  
24 2001) leading to 12.569 person years.

1  
2  
3  
4  
5  
6  
7  
8  
9  
10  
11  
12  
13  
14  
15  
16  
17  
18  
19  
20  
21  
22  
23  
24  
25  
26  
27  
28  
29  
30  
31  
32  
33  
34  
35  
36  
37  
38  
39  
40  
41  
42  
43  
44  
45  
46  
47  
48  
49  
50  
51  
52  
53  
54  
55  
56  
57  
58  
59  
60

1  
2  
3  
4  
5  
6  
7  
8  
9  
10  
11  
12  
13  
14  
15  
16  
17  
18  
19  
20  
21  
22  
23  
24  
25  
26  
27  
28  
29  
30  
31  
32  
33  
34  
35  
36  
37  
38  
39  
40  
41  
42  
43  
44  
45  
46  
47  
48  
49  
50  
51  
52  
53

## *Outcome data*

For every person in the study population labour market status was recorded on a weekly basis until the person reached the age limit of 63 years, emigrated, died, or until the end of follow-up whichever came first. Labour market status was categorized in four different 'states': work, sickness absence, unemployment, and disability. The multi-state model is a model for the nine possible transitions between these four states (Figure 1).

## *Statistical analysis*

Descriptive analysis by use of  $\chi^2$  and t-tests was conducted in order to examine the characteristics of the sample. The outcome data was recoded and for each person time spent in one of the four states was registered. Furthermore it was registered if a transition to another state occurred at the end of the persons stay in the state, and, if so, what state the person shifted to. The time spent in the state was censored if the person died, emigrated, or shifted to a social transfer payment that did not fit any of the four states.

Each of the nine possible transitions shown in Figure 1 was analysed using the Cox proportional hazards model in SAS (The PHREG procedure, SAS version 9.2). The time scale used was duration of stay in current state.

The variables education, disposal income, job type, type of cancer, cancer stage, comorbidity, ASA score, curative operation, type of operation, post-operative complications were included as time constant covariates. Three time dependent covariates were also included: number of times the person been employed, had been sick-listed, or unemployment since the start of follow up.

1 Because the baseline hazard for each state was allowed to vary freely, the covariate relied on the  
2 assumption of proportionality.

3

### 4 **3. Results**

5 Table 1 shows the baseline characteristics for all patients stratified on those excluded during the  
6 first year after diagnosis (N=1689) and the study population (N=4343). Compared to the excluded  
7 population the study population was diagnosed with significantly less severe disease and higher  
8 SES at time of inclusion.

9 One year after operation 62% of the study population were in work while 32% were sick listed and  
10 6% were unemployed (Table 2). Of those who were working, 58% continued working for an  
11 average of 136 weeks.

12 Table 3 and 4 shows the Hazard Ratio (HR) for transitions between work and sickness absence and  
13 reverse. Previous periods of sickness absence and unemployment reduced the rate of returning to  
14 work with 7% and 12% per episode, whereas previous episodes of work increased the rate of both  
15 work and sickness absence. In addition, we found that increasing levels of education increased the  
16 rate of transition from work back to sickness absence.

17 Return to work after a period of sickness absence (Table 3) was less common among cancer  
18 survivors who were operated in an advanced stage of disease, who did not have curative surgery  
19 and who suffered postoperative complications.

20 Sickness absence following a period of work was primarily associated with disease related factors  
21 (Table 4). In contrast to return to work, patients diagnosed with rectal cancer had an increased risk  
22 for sickness absence (HR=1.17 (1.03-1.32)) compared to those operated for colonic cancer.

23 Furthermore we found that an ASA score on III increased the risk for sickness absence with almost  
24 40%.

1  
2  
3  
4  
5  
6  
7  
8  
9  
10  
11  
12  
13  
14  
15  
16  
17  
18  
19  
20  
21  
22  
23  
24  
25  
26  
27  
28  
29  
30  
31  
32  
33  
34  
35  
36  
37  
38  
39  
40  
41  
42  
43  
44  
45  
46  
47  
48  
49  
50  
51  
52  
53  
54  
55  
56  
57  
58  
59  
60

1 The risk factors associated with permanently withdrawal from the labor market one year after  
2 operation are shown in Table 5. Since the transition from work and unemployment to retirement  
3 follows the same pathways, these groups were joined in order to gain more power. The risk for  
4 retirement was not only related to the disease but also to SES. Manual work and increasing disposal  
5 income reduces the risk for retirement after an episode of sickness absence and work, respectively.  
6 Compared to patients in work, the HR for retirement was 5.89 (3.46-10.03) among unemployed  
7 survivors.

8 Advanced stage at diagnosis and high ASA score increased the risk for retirement among both  
9 groups.

10 Finally, we analyzed for effect modification by adding an interaction in the logistic model between  
11 disposal income as the strongest socioeconomic predictor and type of cancer, stage of disease, type  
12 of operation and post-operative complications. We did not find any significant effect modification  
13 between socioeconomic factors and disease related factors (Data not shown).

#### 15 4. Discussion and conclusion

16 In this cohort study including 4343 Danish colorectal cancer patients, who were part of the  
17 workforce after the first postoperative year, we found that 62% were working one year after  
18 operation.

19 One year after operation previous episodes of sickness absence and unemployment, cancer stage at  
20 diagnosis, curative operation and post-operative complications were associated with labor market  
21 affiliation during follow-up whereas SES was only weakly associated with the transition between  
22 the different occupational states.

1 The observed rate of return to work is in accordance with previous studies on colorectal cancer  
2 survivors, where return to full time employment was reported in 60%-89% dependent on time from  
3 diagnosis, definition of return to work and severity of the disease.

4 In this study we decided only to include survivors, who were still part of the workforce one year  
5 after operation, based on a notion that it is not clinical relevant to study full return to work before  
6 the end of a one-year survival period. In this selected group of patients the observed resumption of  
7 work was rather low compared to previous studies where up to 89% of patients had returned to  
8 work at some point after diagnosis<sup>34</sup>. This could be caused by the fact that there is a lack of  
9 consensus regarding definition and measurement of return to work. Thus, in some studies return to  
10 work is simply the number of persons working at time of follow-up divided by the number working  
11 at baseline<sup>10,35</sup>. In other studies return to work is measured among those persons, who are part of  
12 the workforce at time of follow-up, and in still other studies working is self-reported and covers  
13 from one week to permanently re-employed<sup>34</sup>

14 The lack of a clear definition can result in misinterpretation of factors related to the disease and SES  
15 since the underlying mechanisms in the transition from sickness absence back to work or to  
16 disability pension seems to follow different pathways. Leaving the workforce for any type of  
17 pension is an irreversible process and is assigned when work demands exceeds health and mental  
18 resources and is thus dependent on both health and work related factors. On the other hand,  
19 unemployment and sickness absence both include conditions with an expectation of resuming work  
20 and is more related to either SES or health, respectively.

21 The exclusion of persons who take disability pension the first year and the lower social one-year  
22 survival after colorectal cancer among socially deprived might explain our finding of no effect of  
23 SES on work and sickness absence one year after diagnosis of colorectal cancer. It seems as a

1  
2  
3  
4  
5  
6  
7  
8  
9  
10  
11  
12  
13  
14  
15  
16  
17  
18  
19  
20  
21  
22  
23  
24  
25  
26  
27  
28  
29  
30  
31  
32  
33  
34  
35  
36  
37  
38  
39  
40  
41  
42  
43  
44  
45  
46  
47  
48  
49  
50  
51  
52  
53  
54  
55  
56  
57  
58  
59  
60

1 'healthy worker effect' where the most affluent survive the first year without leaving the workforce  
2 for disability pension.

3 In the present study, the transition between work, sickness absence and disability pension one year  
4 after operation was primarily associated with factors related to the cancer disease.

5 The risk for transition from work to sickness absence was increased if the disease was diagnosed at  
6 a later stage, not operated curatively and with occurrence of post-operative complications. The  
7 opposite was found for the transition from sickness absence back to work. The association between  
8 disease related factors and resuming of work after a cancer diagnosis including colorectal cancer  
9 has been observed in other studies where tumor stage<sup>13;36</sup>, treatment<sup>4;36</sup>, physical symptoms<sup>16</sup> and  
10 ASA-score were reported to be negatively associated with return to work.

11 We found that persons diagnosed with rectal cancer had a significant increased risk for sickness  
12 absence and retirement possibly due to the fact that this patient group in contrast to colon cancer  
13 patients more often will have to learn to take care of an ostomy or suffer from abnormal bowel and  
14 urinary function years after the operation<sup>37</sup>. Unfortunately, we could not account for these factors in  
15 our analysis.

### 17 *Strengths and limitations*

18 The present study is based on data from a well-defined clinical database of all Danish colorectal  
19 cancer patients. The database has a high completeness and data validity and missing values are  
20 random and not associated with the outcome under study whereby selection-bias is removed.

21 Variables regarding socioeconomic position and the affiliation to the labour market are  
22 administrative data collected prospectively why recall-bias is eliminated.

23 This study has, however, some limitations. First of all we were not able to include complementary  
24 treatment as chemotherapy and radiation, reduced working hours or job changes in our analysis.

1 Complementary cancer treatment can have a negative effect on the physical and psychological work  
2 ability and has been shown to be associated with reductions in work hours and reassignment to  
3 other work tasks<sup>11;16;36</sup>. We defined return to work as not receiving any transfer payments for six  
4 consecutive weeks. This can lead to misclassification of persons leaving the workforce without  
5 receiving economic compensation from the state. This is, however, very seldom in Denmark and  
6 can be ignored in this study.

7 The present study is conducted in a Nordic welfare system with high turnover rates on the labour  
8 market, high rates of participation and high degrees of social security. Despite the fact that the  
9 expenditures to social protection in the Nordic countries including Denmark is higher compared to  
10 the rest of the European Union and countries as US and Canada they all have some degree of social  
11 welfare systems and universal health care. The size of economic compensation and duration of  
12 sickness absence might have an impact on the consequence of a chronic disease but the risk factors  
13 and reasons for being on sickness absence or return to work is not influenced by the political  
14 context.

### 16 *Conclusion*

17 This nationwide study of colorectal cancer patients who have survived one year shows that stage of  
18 disease, general health state of the individual (ASA score), post-operative complications and the  
19 history of sickness absence and unemployment have an impact on the transition between work,  
20 sickness absence and disability pension. This leads to an increased focus on the rehabilitation  
21 process for the more vulnerable persons who have a history of work related problems with episodes  
22 outside the working market. In addition, special attention should be on the impact complications  
23 and stage of disease has on the work ability in order to reduce the risk for sickness absence and  
24 retirement years after operation.

1  
2  
3  
4  
5  
6  
7  
8  
9  
10  
11  
12  
13  
14  
15  
16  
17  
18  
19  
20  
21  
22  
23  
24  
25  
26  
27  
28  
29  
30  
31  
32  
33  
34  
35  
36  
37  
38  
39  
40  
41  
42  
43  
44  
45  
46  
47  
48  
49  
50  
51  
52  
53  
54  
55  
56  
57  
58  
59  
60

1

## 2 **Acknowledgment**

3 This work is funded by The Danish Cancer Society and The Novo Nordisk Foundation and is part  
4 of The Centre for Integrated Rehabilitation of Cancer Patients (CIRE).

5

6 **Ethics approval:** The study based solely on national and administrative registers and did not  
7 require any approval from the ethics committee according to national regulations.

8

## 9 **Author contribution:**

10 Study conception and design: All authors

11 Acquisition of data: Merete Osler and Kathrine Carlsen

12 Analysis of data: Kathrine Carlsen

13 Interpretation of data: All authors

14 Writing manuscript: All authors



1 Figure 1: Transition states between labor market outcomes in Denmark. Work, sickness absence and  
2 unemployment covers persons in the workforce while retirement independent of reason (disability  
3 or age) are an irreversible state, where persons are considered to leave the workforce forever.

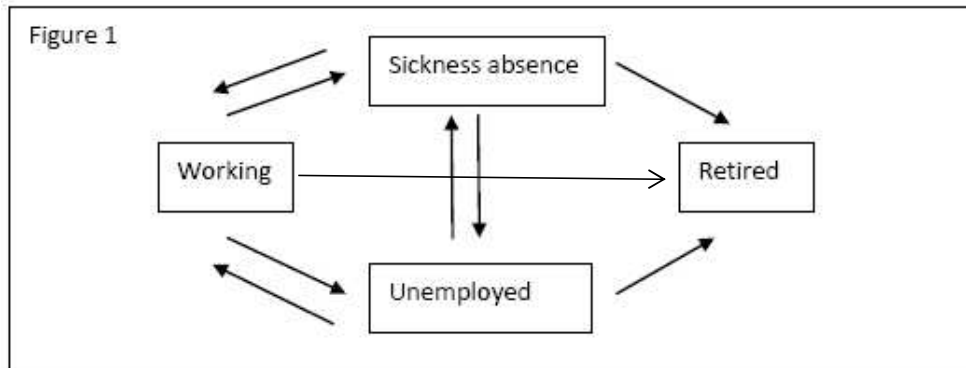

4  
5

1  
2  
3  
4  
5 1  
6 2 Figure 2: Flowchart showing the selection of persons from the total database to the final study  
7 3 population\*.  
8

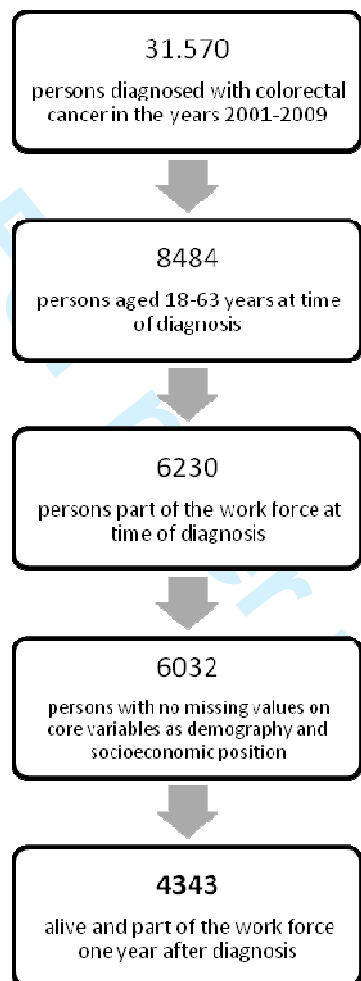

9  
4  
5 \* From January 2001 to December 2009 a total of 31 570 persons were diagnosed with colonic or rectal cancer. In total we excluded 25 538 persons:  
6 23 086 persons as they were not in their working-age (18-63 years) at time of diagnosis, 2254 had retired due to disability before diagnosis and 198  
7 because of missing values on demographic or socioeconomic variables. In addition, 1689 persons died or withdrew from the workforce within the first  
8 year after diagnosis.  
9

1  
2  
3  
4  
5  
6  
7  
8  
9  
10  
11  
12  
13  
14  
15  
16  
17  
18  
19  
20  
21  
22  
23  
24  
25  
26  
27  
28  
29  
30  
31  
32  
33  
34  
35  
36  
37  
38  
39  
40  
41  
42  
43  
44  
45  
46  
47  
48  
49  
50  
51  
52  
53  
54  
55  
56  
57  
58  
59  
60

1  
2  
3

Table 1: Characteristics of the colorectal cancer patients diagnosed in Denmark while in their working age and part of the work force, 2001-2009 (N=6032). Divided into those who were excluded during the first year due to retirement or death (N=1689) and the included persons (N=4343).

|                                                  | Excluded during the first year N (%) | Included after the first year N (%) | P      |
|--------------------------------------------------|--------------------------------------|-------------------------------------|--------|
| <b>Education</b>                                 |                                      |                                     | <.0001 |
| Primary school                                   | 584 (35)                             | 1244 (29)                           |        |
| Vocational and short education                   | 781 (46)                             | 2037 (47)                           |        |
| Medium and long education                        | 324 (19)                             | 1062 (24)                           |        |
| Unknown                                          | 0 (0)                                | 0 (0)                               |        |
| <b>Disposal income (DKr.)</b>                    |                                      |                                     | <.0001 |
| Mean                                             | 192 206                              | 210 807                             |        |
| <b>Job type</b>                                  |                                      |                                     | <.0001 |
| Management and knowledge work                    | 190 (11)                             | 740 (17)                            |        |
| Office and sale (non-manual)                     | 401 (24)                             | 1414 (33)                           |        |
| Manual                                           | 893 (53)                             | 1661 (38)                           |        |
| Other                                            | 205 (12)                             | 528 (12)                            |        |
| <b>Gender</b>                                    |                                      |                                     | 0.03   |
| Women                                            | 691 (41)                             | 1913 (44)                           |        |
| Men                                              | 998 (59)                             | 2430 (56)                           |        |
| <b>Age</b>                                       |                                      |                                     | <.0001 |
| Mean                                             | 56.6                                 | 53.8                                |        |
| <b>Country of birth</b>                          |                                      |                                     | 0.02   |
| Denmark                                          | 1637 (97)                            | 4150 (96)                           |        |
| Other                                            | 52 (3)                               | 193 (4)                             |        |
| <b>Marital status</b>                            |                                      |                                     | <.0001 |
| Married / cohabiting                             | 1042 (62)                            | 3162 (73)                           |        |
| Single                                           | 494 (29)                             | 1154 (26)                           |        |
| Unknown                                          | 153 (9)                              | 27 (1)                              |        |
| <b>Year of operation</b>                         |                                      |                                     | 0.55   |
| 2001                                             | 104 (6)                              | 309 (7)                             |        |
| 2002                                             | 178 (10)                             | 458 (10)                            |        |
| 2003                                             | 176 (10)                             | 439 (10)                            |        |
| 2004                                             | 213 (13)                             | 494 (11)                            |        |
| 2005                                             | 210 (12)                             | 486 (11)                            |        |
| 2006                                             | 199 (12)                             | 568 (13)                            |        |
| 2007                                             | 211 (12)                             | 545 (13)                            |        |
| 2008                                             | 197 (12)                             | 530 (12)                            |        |
| 2009                                             | 201 (12)                             | 514 (12)                            |        |
| <b>Type of cancer</b>                            |                                      |                                     | <.0001 |
| Colonic                                          | 1063 (63)                            | 2464 (57)                           |        |
| Rectal                                           | 626 (37)                             | 1879 (43)                           |        |
| <b>Stage</b>                                     |                                      |                                     | <.0001 |
| I                                                | 306 (18)                             | 1535 (35)                           |        |
| II                                               | 43 (3)                               | 146 (3)                             |        |
| III                                              | 351 (21)                             | 1411 (32)                           |        |
| IV                                               | 858 (51)                             | 760 (18)                            |        |
| Unknown                                          | 131 (8)                              | 491 (11)                            |        |
| <b>Comorbidity</b>                               |                                      |                                     | <.0001 |
| No                                               | 1447 (86)                            | 4018 (93)                           |        |
| Yes                                              | 224 (14)                             | 325 (7)                             |        |
| <b>ASA</b>                                       |                                      |                                     | <.0001 |
| I                                                | 484 (29)                             | 2168 (50)                           |        |
| II                                               | 771 (46)                             | 1731 (40)                           |        |
| ->III                                            | 240 (14)                             | 172 (4)                             |        |
| Unknown                                          | 194 (11)                             | 272 (6)                             |        |
| <b>Curative operation</b>                        |                                      |                                     | <.0001 |
| Yes                                              | 677 (40)                             | 3278 (75)                           |        |
| No                                               | 884 (52)                             | 867 (20)                            |        |
| Unknown                                          | 128 (8)                              | 198 (5)                             |        |
| <b>Type of operation</b>                         |                                      |                                     | <.0001 |
| Rectal resection                                 | 228 (14)                             | 206 (5)                             |        |
| Colonic resection                                | 306 (18)                             | 1352 (31)                           |        |
| Explorative laparotomy or formation of an ostomy |                                      |                                     |        |
| Local procedures                                 | 537 (32)                             | 1445 (33)                           |        |
| Unknown                                          | 367 (22)                             | 1197 (28)                           |        |
|                                                  | 251 (15)                             | 143 (3)                             |        |
| <b>Post-operative complications</b>              |                                      |                                     | 0.44   |
| No                                               | 1448 (86)                            | 3689 (85)                           |        |
| Yes                                              | 241 (14)                             | 654 (15)                            |        |

1 Table 2  
 2 Mean number of weeks from one state of employment to the next among 4343 patients aged 18-63  
 3 years diagnosed with colorectal cancer in the years 2001 to 2009 and part of the workforce at time  
 4 of follow-up.

| Mean time in weeks from one year after operation and first change in employment state (% of population) | To work  | To sickness absence | To unemployment | To retirement | To censoring due to age, dead, migration or end of follow-up |
|---------------------------------------------------------------------------------------------------------|----------|---------------------|-----------------|---------------|--------------------------------------------------------------|
| From work (N=2679 / 62%)                                                                                | --       | 57 (31%)            | 63 (10%)        | 75 (1%)       | 136 (58%)                                                    |
| From sickness absence (N=1406 / 32%)                                                                    | 16 (34%) | --                  | 29 (9%)         | 30 (28%)      | 36 (30%)                                                     |
| From unemployment (N=258/ 6%)                                                                           | 22 (47%) | 28 (17%)            | --              | 63 (13%)      | 77 (23%)                                                     |

5  
6



1  
2  
3  
4  
5  
6  
7  
8  
9  
10  
11  
12  
13  
14  
15  
16  
17  
18  
19  
20  
21  
22  
23  
24  
25  
26  
27  
28  
29  
30  
31  
32  
33  
34  
35  
36  
37  
38  
39  
40  
41  
42  
43  
44  
45  
46  
47  
48  
49  
50  
51  
52  
53  
54  
55  
56  
57  
58  
59  
60

1  
2

Table 4: HR (95% CI) for sickness absence after an episode of work in relation to socioeconomic and clinical factors among 4343 patients aged 18-63 diagnosed with colorectal cancer in the years 2001 to 2009, and part of the work force at time of follow-up.

| WORK → SICKNESS ABSENCE                          | HR - unadjusted (events: 2296)         | HR - adjusted for SES§               | HR - adjusted for SES§ and confounders* | HR - adjusted for SES§, confounders* and clinical variables |
|--------------------------------------------------|----------------------------------------|--------------------------------------|-----------------------------------------|-------------------------------------------------------------|
| <b>Education</b>                                 |                                        |                                      |                                         |                                                             |
| Primary school                                   | 1                                      | 1                                    | 1                                       | 1                                                           |
| Vocational and short education                   | 1.25 (1.11-1.41)□                      | 1.10 (0.96-1.27)                     | 1.10 (0.96-1.27)                        | 1.07 (0.93-1.23)                                            |
| Medium and long education                        | 1.40 (1.26-1.56)□□                     | 1.22 (1.08-1.38)□                    | 1.21 (1.07-1.37)□                       | 1.18 (1.04-1.34)□                                           |
| <b>Disposal income #</b>                         |                                        |                                      |                                         |                                                             |
| Lowest quartile                                  | 1                                      | 1                                    | 1                                       | 1                                                           |
| Second lowest quartile                           | 1.18 (1.04-1.33)                       | 1.18 (1.05-1.34)□                    | 1.17 (1.03-1.33)                        | 1.13 (0.99-1.28)                                            |
| Second highest quartile                          | 1.02 (0.91-1.16)                       | 1.04 (0.92-1.18)                     | 1.02 (0.90-1.16)                        | 1.00 (0.88-1.14)                                            |
| Highest quartile                                 | 0.82 (0.73-0.94)□                      | 0.99 (0.87-1.14)                     | 0.99 (0.86-1.14)                        | 0.96 (0.84-1.11)                                            |
| <b>Job type</b>                                  |                                        |                                      |                                         |                                                             |
| Management and knowledge work                    | 0.69 (0.61-0.78)□□<br>0.89 (0.82-0.98) | 0.96 (0.83-1.12)<br>1.00 (0.91-1.10) | 0.97 (0.84-1.14)<br>1.00 (0.91-1.12)    | 0.95 (0.82-1.11)<br>1.00 (0.90-1.11)                        |
| Office and sale (non-manual)                     | 1                                      | 1                                    | 1                                       | 1                                                           |
| Manual                                           | 0.67 (0.54-0.83)□                      | 0.84 (0.67-1.04)                     | 1.00 (0.48-1.82)                        | 1.06 (0.51-1.93)                                            |
| Other                                            |                                        |                                      |                                         |                                                             |
| <b>Previous episodes of work</b>                 | 1.03 (1.03-1.03)□□                     | 1.02 (1.01-1.04)□                    | 1.02 (1.01-1.04)□                       | 1.03 (1.01-1.04)□                                           |
| <b>Previous episodes of sickness absence</b>     | 1.10 (1.09-1.11)□□                     | 1.08 (1.06-1.09)□□                   | 1.08 (1.06-1.09)□□                      | 1.08 (1.06-1.09)□□                                          |
| <b>Previous episodes of unemployment</b>         | 1.01 (1.01-1.02)□                      | 0.98 (0.97-0.99)□                    | 0.98 (0.97-0.99)□                       | 0.98 (0.97-0.99)□                                           |
| <b>Type of cancer</b>                            |                                        |                                      |                                         |                                                             |
| Colonic                                          | 1                                      |                                      |                                         | 1                                                           |
| Rectal                                           | 1.10 (1.01-1.19)                       |                                      |                                         | 1.17 (1.03-1.32)□                                           |
| <b>Stage</b>                                     |                                        |                                      |                                         |                                                             |
| I                                                | 1                                      |                                      |                                         | 1                                                           |
| II                                               | 0.97(0.74-1.25)                        |                                      |                                         | 0.99(0.75-1.28)                                             |
| III                                              | 1.29 (1.16-1.41)□                      |                                      |                                         | 1.24 (1.11-1.37)□                                           |
| IV                                               | 1.63 (1.40-1.88)□□                     |                                      |                                         | 1.52 (1.21-1.91)□                                           |
| Unknown                                          | 1.11 (0.98-1.25)                       |                                      |                                         | 1.08 (0.91-1.29)                                            |
| <b>Co-morbidity</b>                              |                                        |                                      |                                         |                                                             |
| No                                               | 1                                      |                                      |                                         | 1                                                           |
| Yes                                              | 0.99 (0.90-1.08)                       |                                      |                                         | 1.05 (0.96-1.16)                                            |
| <b>ASA</b>                                       |                                        |                                      |                                         |                                                             |
| I                                                | 1                                      |                                      |                                         | 1                                                           |
| II                                               | 1.09 (1.00-1.19)                       |                                      |                                         | 1.09 (0.99-1.20)                                            |
| ->III                                            | 1.42 (1.12-1.75)□                      |                                      |                                         | 1.33 (1.05-1.67)□                                           |
| Unknown                                          | 1.02 (0.85-1.21)                       |                                      |                                         | 0.92 (0.70-1.19)                                            |
| <b>Curative operation</b>                        |                                        |                                      |                                         |                                                             |
| Yes                                              | 1                                      |                                      |                                         | 1                                                           |
| No                                               | 1.43 (1.26-1.61)□□                     |                                      |                                         | 1.35 (1.11-1.63)□                                           |
| Unknown                                          | 1.05 (0.87-1.29)                       |                                      |                                         | 1.07 (0.77-1.45)                                            |
| <b>Type of operation</b>                         |                                        |                                      |                                         |                                                             |
| Rectal resection                                 | 1                                      |                                      |                                         | 1                                                           |
| Colonic resection                                | 1.0 (0.91-1.11)                        |                                      |                                         | 1.10 (0.97-1.25)                                            |
| Explorative laparotomy or formation of an ostomy | 0.91 (0.82-1.01)                       |                                      |                                         | 1.05 (0.91-1.22)                                            |
| Local procedures                                 | 0.72 (0.56-0.91)□                      |                                      |                                         | 0.78 (0.60-1.01)                                            |
| Unknown                                          | 0.93 (0.66-1.26)                       |                                      |                                         | 0.81 (0.53-1.20)                                            |
| <b>Post-operative complications</b>              |                                        |                                      |                                         |                                                             |
| No                                               | 1                                      |                                      |                                         | 1                                                           |
| Yes                                              | 1.18 (1.05-1.31)□                      |                                      |                                         | 1.25 (1.11-1.41)□                                           |

\*Confounders: Gender, age at time of diagnosis, country of birth, marital status and year of operation

§ SES (Socioeconomic status): education, disposal income and job type

□ Significant at a 0.05 level

□□ Significant at a <.0001 level

# Depending on year the highest disposal income ranged from 175.500 DKr in 2001 to 299.717 DKr in 2009

1  
2  
3  
4  
5  
6  
7  
8  
9  
10  
11  
12  
13  
14  
15  
16  
17  
18  
19  
20  
21  
22  
23  
24  
25  
26  
27  
28  
29  
30  
31  
32  
33  
34  
35  
36  
37  
38  
39  
40  
41  
42  
43  
44  
45  
46  
47  
48  
49  
50  
51  
52  
53  
54  
55  
56  
57  
58  
59  
60

1  
2

Table 5: HR (95% CI) for retirement in relation to socioeconomic and clinical factors among 4343 patients aged 18-63 diagnosed with colorectal cancer in the years 2001 to 2009, and part of the work force at time of follow-up.

| Mutually adjusted and controlled for confounders* | HR for transition from sickness absence -> retirement (number of events:569) | HR for transition from work / unemployed -> retirement (number of events: 109) |
|---------------------------------------------------|------------------------------------------------------------------------------|--------------------------------------------------------------------------------|
| <b>Status</b>                                     |                                                                              |                                                                                |
| Working                                           | ---                                                                          | 1                                                                              |
| Unemployed                                        |                                                                              | 5.89 (3.46-10.03)□□                                                            |
| <b>Education</b>                                  |                                                                              |                                                                                |
| Primary school                                    | 1                                                                            | 1                                                                              |
| Vocational and short education                    | 1.13 (0.85-1.51)                                                             | 1.29 (0.65-2.69)                                                               |
| Medium and long education                         | 1.06 (0.81-1.41)                                                             | 1.24 (0.64-2.53)                                                               |
| <b>Disposal income #</b>                          |                                                                              |                                                                                |
| Lowest quartile                                   | 1                                                                            | 1                                                                              |
| Second lowest quartile                            | 0.95 (0.76-1.19)                                                             | 0.49 (0.27-0.85)□                                                              |
| Second highest quartile                           | 0.77 (0.60-0.98)□                                                            | 0.47 (0.25-0.83)□                                                              |
| Highest quartile                                  | 0.79 (0.60-1.04)                                                             | 0.29 (0.14-0.57)□                                                              |
| <b>Job type</b>                                   |                                                                              |                                                                                |
| Management and knowledge work                     | 0.59 (0.42-0.82)□                                                            | 0.93 (0.85-1.03)                                                               |
| Office and sale (non-manual)                      | 0.72 (0.580.89)□                                                             | 0.96 (0.86-1.06)                                                               |
| Manual                                            | 1                                                                            | 1                                                                              |
| Other                                             | 1.05 (0.06-4.85)                                                             | 0.38 (0.12-1.37)                                                               |
| <b>Previous episodes of work</b>                  | 0.98 (0.95-1.00)                                                             | 0.93 (0.85-1.03)                                                               |
| <b>Previous episodes of sickness absence</b>      | 1.00 (0.97-1.02)                                                             | 0.96 (0.86-1.06)                                                               |
| <b>Previous episodes of unemployment</b>          | 1.03 (1.00-1.05)□                                                            | 1.02 (0.94-1.11)                                                               |
| <b>Type of cancer</b>                             |                                                                              |                                                                                |
| Colonic                                           | 1                                                                            | 1                                                                              |
| Rectal                                            | 1.32 (1.04-1.67)□                                                            | 1.33 (0.75-2.34)                                                               |
| <b>Stage</b>                                      |                                                                              |                                                                                |
| I                                                 | 1                                                                            | 1                                                                              |
| II                                                | 0.85 (0.46-1.46)                                                             | 1.70 (0.49-4.51)                                                               |
| III                                               | 1.13 (0.89-1.44)                                                             | 1.91 (1.15-3.21)□                                                              |
| IV                                                | 1.58 (1.04-2.42)□                                                            | 2.30 (0.88-6.14)                                                               |
| Unknown                                           | 1.01 (0.68-1.50)                                                             | 1.72 (0.82-3.59)                                                               |
| <b>Comorbidity</b>                                |                                                                              |                                                                                |
| No                                                | 1                                                                            | 1                                                                              |
| Yes                                               | 1.03 (0.85-1.24)                                                             | 1.17 (0.76-1.77)                                                               |
| <b>ASA</b>                                        |                                                                              |                                                                                |
| I                                                 | 1                                                                            | 1                                                                              |
| II                                                | 1.31 (1.08-1.58)□                                                            | 1.56 (1.00-2.44)□                                                              |
| III                                               | 2.16 (1.49-3.06)□                                                            | 2.57 (1.03-5.75)□                                                              |
| Unknown                                           | 1.29 (0.76-2.09)                                                             | 1.64 (0.50-4.24)                                                               |
| <b>Curative operation</b>                         |                                                                              |                                                                                |
| Yes                                               | 1                                                                            | 1                                                                              |
| No                                                | 1.30 (0.89-1.86)                                                             | 1.80 (0.77-3.84)                                                               |
| Unknown                                           | 1.41 (0.75-2.51)                                                             | 1.05 (0.19-4.01)                                                               |
| <b>Type of operation</b>                          |                                                                              |                                                                                |
| Rectal resection                                  | 1                                                                            | 1                                                                              |
| Colonic resection                                 | 1.42 (1.11-1.81)□                                                            | 1.36 (0.74-2.51)                                                               |
| Explorative laparotomy or formation of an ostomy  | 1.06 (0.78-1.43)                                                             | 1.23 (0.55-2.32)                                                               |
| Local procedures                                  | 1.01 (0.53-1.84)                                                             | 0.39 (0.08-1.26)                                                               |
| Unknown                                           | 1.45 (0.93-2.18)                                                             | 0.84 (0.16-3.13)                                                               |
| <b>Post-operative complications</b>               |                                                                              |                                                                                |
| No                                                | 1                                                                            | 1                                                                              |
| Yes                                               | 1.23 (1.00-1.51)□                                                            | 0.86 (0.47-1.46)                                                               |

\*Confounders: Gender, age at time of diagnosis, country of birth, marital status and year of operation

□ Significant at a 0.05 level

□□ Significant at a <.0001 level

# Depending on year the highest disposal income ranged from 175.500 DKr in 2001 to 299.717 DKr in 2009

## Reference List

- 1  
2  
3  
4 1  
5  
6 2  
7 3  
8 4  
9 5  
10  
11  
12 6  
13 7  
14 8  
15 9  
16  
17 10  
18 11  
19 12  
20  
21 13  
22 14  
23  
24 15  
25 16  
26 17  
27  
28  
29 18  
30 19  
31 20  
32  
33 21  
34 22  
35 23  
36  
37 24  
38 25  
39 26  
40  
41  
42 27  
43 28  
44 29  
45  
46 30  
47 31  
48 32  
49  
50 33  
51 34  
52 35  
53  
54  
55 36  
56 37  
57 38  
58  
59  
60
- (1) Ferlay J, Parkin DM, Steliarova-Foucher E. Estimates of cancer incidence and mortality in Europe in 2008. *Eur J Cancer* 2010; 46(4):765-781.
- (2) Coleman MP, Forman D, Bryant H, Butler J, Rachet B, Maringe C et al. Cancer survival in Australia, Canada, Denmark, Norway, Sweden, and the UK, 1995-2007 (the International Cancer Benchmarking Partnership): an analysis of population-based cancer registry data. *Lancet* 2011; 377(9760):127-138.
- (3) Brenner H, Bouvier AM, Foschi R, Hackl M, Larsen IK, Lemmens V et al. Progress in colorectal cancer survival in Europe from the late 1980s to the early 21st century: the EURO CARE study. *Int J Cancer* 2012; 131(7):1649-1658.
- (4) Gordon L, Lynch BM, Newman B. Transitions in work participation after a diagnosis of colorectal cancer. *Aust N Z J Public Health* 2008; 32(6):569-574.
- (5) van den Brink M, van den Hout WB, Kievit J, Marijnen CA, Putter H, van de Velde CJ et al. The impact of diagnosis and treatment of rectal cancer on paid and unpaid labor. *Dis Colon Rectum* 2005; 48(10):1875-1882.
- (6) Frederiksen BL, Osler M, Harling H, Ladelund S, Jorgensen T. The impact of socioeconomic factors on 30-day mortality following elective colorectal cancer surgery: a nationwide study. *Eur J Cancer* 2009; 45(7):1248-1256.
- (7) Cavalli-Bjorkman N, Lambe M, Eaker S, Sandin F, Glimelius B. Differences according to educational level in the management and survival of colorectal cancer in Sweden. *Eur J Cancer* 2011; 47(9):1398-1406.
- (8) Egeberg R, Halkjaer J, Rottmann N, Hansen L, Holten I. Social inequality and incidence of and survival from cancers of the colon and rectum in a population-based study in Denmark, 1994-2003. *Eur J Cancer* 2008; 44(14):1978-1988.
- (9) Aarts MJ, Lemmens VEPP, Louwman MWJ, Kunst AE, Coebergh JW. Socioeconomic status and changing inequalities in colorectal cancer? A review of the associations with risk, treatment and outcome. *European Journal of Cancer* 2010; 46(15):2681-2695.
- (10) Drolet M, Maunsell E, Brisson J, Brisson C, Masse B, Deschenes L. Not Working 3 Years After Breast Cancer: Predictors in a Population-Based Study. *J Clin Oncol* 2005; 23(33):8305-8312.
- (11) Steiner JF, Cavender TA, Nowels CT, Beaty BL, Bradley CJ, Fairclough DL et al. The impact of physical and psychosocial factors on work characteristics after cancer. *Psychooncology* 2008; 17(2):138-147.
- (12) Paraponaris A, Teyssier LS, Ventelou B. Job tenure and self-reported workplace discrimination for cancer survivors 2 years after diagnosis: does employment legislation matter? *Health Policy* 2010; 98(2-3):144-155.



- 1  
2  
3  
4 1 (13) Earle CC, Chretien Y, Morris C, Ayanian JZ, Keating NL, Polgreen LA et al. Employment  
5 2 among survivors of lung cancer and colorectal cancer. *J Clin Oncol* 2010; 28(10):1700-  
6 3 1705.
- 8 4 (14) Spelten ER, Sprangers MA, Verbeek JH. Factors reported to influence the return to work of  
9 5 cancer survivors: a literature review. *Psychooncology* 2002; 11(2):124-131.  
10 6
- 11 7 (15) Short PF, Vasey JJ, Tunceli K. Employment pathways in a large cohort of adult cancer  
12 8 survivors. *Cancer* 2005; 103(6):1292-1301.
- 14 9 (16) Mehnert A. Employment and work-related issues in cancer survivors. *Crit Rev Oncol*  
15 10 *Hematol* 2011; 77(2):109-130.
- 17 11 (17) Dalton SO, Steding-Jessen M, Gislum M, Frederiksen K, Engholm G, Schuz J. Social  
18 12 inequality and incidence of and survival from cancer in a population-based study in  
19 13 Denmark, 1994-2003: Background, aims, material and methods. *Eur J Cancer* 2008;  
20 14 44(14):1938-1949.
- 22 15 (18) Amir Z, Moran T, Walsh L, Iddenden R, Luker K. Return to paid work after cancer: a British  
23 16 experience. *J Cancer Surviv* 2007; 1(2):129-136.
- 25 17 (19) Carlsen K, Dalton SO, Frederiksen K, Diderichsen F, Johansen C. Cancer and the risk for  
26 18 taking early retirement pension: A Danish cohort study. *Scandinavian Journal of Public*  
27 19 *Health* 2008; 36(2):117-125.
- 29 20 (20) Sjøvall K, Attner B, Englund M, Lithman T, Noreen D, Gunnars B et al. Sickness absence  
30 21 among cancer patients in the pre-diagnostic and the post-diagnostic phases of five common  
31 22 forms of cancer. *Support Care Cancer* 2012; 20(4):741-747.  
32 23
- 34 24 (21) Syse A, Tretli S, Kravdal O. Cancer's impact on employment and earnings--a population-  
35 25 based study from Norway. *J Cancer Surviv* 2008; 2(3):149-158.
- 37 26 (22) Mols F, Thong MS, Vissers P, Nijsten T, van de Poll-Franse LV. Socio-economic  
38 27 implications of cancer survivorship: results from the PROFILES registry. *Eur J Cancer*  
39 28 2012; 48(13):2037-2042.
- 41 29 (23) Andersen PK, Keiding N. Multi-state models for event history analysis. *Stat Methods Med*  
42 30 *Res* 2002; 11(2):91-115.
- 44 31 (24) Christensen KB, Andersen PK, Smith-Hansen L, Nielsen ML, Kristensen TS. Analyzing  
45 32 sickness absence with statistical models for survival data. *Scand J Work Environ Health*  
46 33 2007; 33(3):233-239.
- 48 34 (25) Gjesdal S, Ringdal PR, Haug K, Maeland JG. Long-term sickness absence and disability  
49 35 pension with psychiatric diagnoses: a population-based cohort study. *Nord J Psychiatry*  
50 36 2008; 62(4):294-301.
- 52 37 (26) Lie SA, Eriksen HR, Ursin H, Hagen EM. A multi-state model for sick-leave data applied to  
53 38 a randomized control trial study of low back pain. *Scand J Public Health* 2008; 36(3):279-  
54 39 283.

1  
2  
3  
4  
5  
6  
7  
8  
9  
10  
11  
12  
13  
14  
15  
16  
17  
18  
19  
20  
21  
22  
23  
24  
25  
26  
27  
28  
29  
30  
31  
32  
33  
34  
35  
36  
37  
38  
39  
40  
41  
42  
43  
44  
45  
46  
47  
48  
49  
50  
51  
52  
53  
54  
55  
56  
57  
58  
59  
60

- (27) Pedersen J, Bjoerner JB, Burr H, Christensen KB. Transitions between sickness absence, work, unemployment, and disability in Denmark 2004-2008. *Scand J Work Environ Health* 2012; 38(6):516-526.
- (28) Oyeflaten I, Lie SA, Ihlebaek CM, Eriksen HR. Multiple transitions in sick leave, disability benefits, and return to work. - A 4-year follow-up of patients participating in a work-related rehabilitation program. *BMC Public Health* 2012; 12:748.
- (29) Frederiksen BL, Osler M, Harling H, Ladelund S, Jorgensen T. Do patient characteristics, disease, or treatment explain social inequality in survival from colorectal cancer? *Soc Sci Med* 2009; 69(7):1107-1115.
- (30) IDA - an integrated data base for labour market research. Main report, 1991 . 2006. Statistics Denmark. Ref Type: Report
- (31) Lynge E, Sandegaard JL, Rebolj M. The Danish National Patient Register. *Scand J Public Health* 2011; 39(7 Suppl):30-33.
- (32) Kildemoes HW, Sorensen HT, Hallas J. The Danish National Prescription Registry. *Scand J Public Health* 2011; 39(7 Suppl):38-41.
- (33) Hjollund NH, Larsen FB, Andersen JH. Register-based follow-up of social benefits and other transfer payments: accuracy and degree of completeness in a Danish interdepartmental administrative database compared with a population-based survey. *Scand J Public Health* 2007; 35(5):497-502.
- (34) Sanchez KM, Richardson JL, Mason HR. The return to work experiences of colorectal cancer survivors. *AAOHN J* 2004; 52(12):500-510.
- (35) Taskila T, Martikainen R, Hietanen P, Lindbohm ML. Comparative study of work ability between cancer survivors and their referents. *Eur J Cancer* 2007; 43(5):914-920.
- (36) Mols F, Thong MS, Vreugdenhil G, van de Poll-Franse LV. Long-term cancer survivors experience work changes after diagnosis: results of a population-based study. *Psychooncology* 2009; 18(12):1252-1260.
- (37) Rodriguez-Bigas MA, Chang GJ, Skibber JM. Barriers to rehabilitation of colorectal cancer patients. *J Surg Oncol* 2007; 95(5):400-408.

Figure 1: Transition states between labor market outcomes in Denmark. Work, sickness absence and unemployment covers persons in the workforce while retirement independent of reason (disability or age) are an irreversible state, where persons are considered to leave the workforce forever.

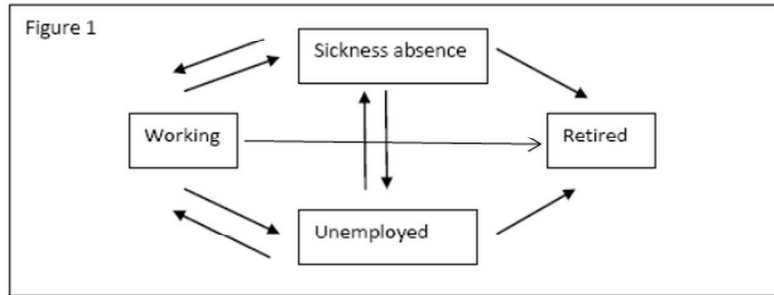

185x90mm (300 x 300 DPI)

Figure 2: Flowchart showing the selection of persons from the total database to the final study population\*.

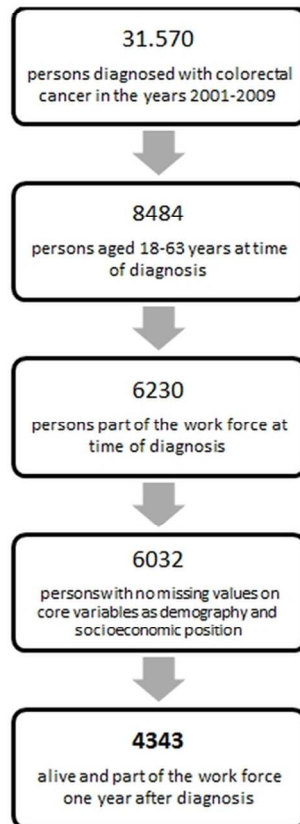

\* From January 2001 to December 2009 a total of 31 570 persons were diagnosed with colonic or rectal cancer. In total we excluded 25 538 persons: 23 086 persons as they were not in their working-age (18-63 years) at time of diagnosis, 2254 had retired due to disability before diagnosis and 198 because of missing values on demographic or socioeconomic variables. In addition, 1689 persons died or withdrew from the workforce within the first year after diagnosis.

90x92mm (300 x 300 DPI)
